1 **Comparative adverse effects, perceptions and attitudes related to BNT162b2,**  
2 **mRNA1273, or JNJ-78436735 SARS-CoV-2 vaccines: A population-based**  
3 **longitudinal cohort**

4  
5 **Authors**

6 Oliver Bürzle<sup>1</sup>, Dominik Menges<sup>1</sup>, Julian D. Maier<sup>1</sup>, Daniel Schams<sup>1</sup>, Milo Puhan<sup>1</sup>, Jan Fehr<sup>1</sup>, Tala  
7 Ballouz<sup>1\*</sup>, Anja Frei<sup>1\*</sup>

8  
9 \* Shared last authorship due to equal contribution.

10 <sup>1</sup> Epidemiology, Biostatistics and Prevention Institute (EBPI), University of Zurich (UZH), Zurich,  
11 Switzerland

12  
13 **Corresponding Author**

14 Anja Frei, PhD

15 Epidemiology, Biostatistics and Prevention Institute, University of Zurich

16 Hirschengraben 84, 8001 Zurich, Switzerland

17 E-Mail: [anja.frei@uzh.ch](mailto:anja.frei@uzh.ch) | Phone: +41 44 634 43 60

18

19 **Alternate Corresponding Author**

20 Jan Fehr, MD

21 Epidemiology, Biostatistics and Prevention Institute, University of Zurich

22 Hirschengraben 84, 8001 Zurich, Switzerland

23 E-Mail: [jan.fehr@uzh.ch](mailto:jan.fehr@uzh.ch) | Phone: +41 44 634 46 79

24

25 **Keywords:** SARS-CoV-2, vaccination, adverse effects, hesitancy, real-world data

26

27 **Running title:** SARS-CoV-2 vaccination adverse effects

28

29 **Main Points:** Our representative population-based cohort study demonstrated the safety of  
30 three SARS-CoV-2 vaccines and provides real-world estimates on adverse effect incidence.

31 Transparent communication of expected adverse effects to vaccine-seeking individuals is pivotal  
32 to build trust in current or future vaccination campaigns.

33

34 **Abstract**

35 **Importance:** Long-term control of SARS-CoV-2 requires effective vaccination strategies. This has  
36 been challenged by public mistrust and spread of misinformation regarding vaccine safety.  
37 Hence, better understanding and communication on the longer-term and comparative  
38 experiences of general population individuals following SARS-CoV-2 vaccination are required.

39

40 **Objective:** To evaluate and compare self-reported adverse effects following SARS-CoV-2  
41 vaccination, participants' perceptions regarding vaccinations and their compliance with  
42 recommended public health measures.

43

44 **Design, Setting and Participants:** Population-based longitudinal cohort of 575 adults, randomly  
45 selected from all individuals presenting to the reference vaccination center of the Canton of  
46 Zurich, Switzerland, for receipt of BNT162b2, mRNA1273, or JNJ-78436735.

47

48 **Exposures:** BNT162b2, mRNA1273, or JNJ-78436735 vaccines.

49

50 **Main Outcomes and Measures:** Primary outcomes included period prevalence, onset, duration,  
51 and severity of self-reported adverse effects over 12 weeks following vaccination with a specific  
52 focus on the proportion of participants reporting allergic reactions, menstrual irregularities, or  
53 cardiac adverse effects, or requiring hospitalization. Secondary outcomes included risk factors  
54 associated with reporting adverse effects, perception of vaccine importance, trust in public

55 health authorities and pharmaceutical companies, and compliance with recommended public  
56 health measures.

57

58 **Results:** 454 (79.0%) participants reported at least one adverse effect during 12 weeks after  
59 vaccination. Prevalence was highest among mRNA-1273 recipients (88.7% vs. 77.3% after  
60 BNT162b2, 69.1% after JNJ-78436735). Most adverse effects were systemic (72%), occurred  
61 within 24 hours (67.9%), and resolved in less than three days (76.3%). 85.2% were reported as  
62 mild or moderate. Allergic reactions were reported by 0.4% of participants, hospitalizations by  
63 0.7%, cardiac adverse effects by 1.4%. Menstrual irregularities were reported by 9% of female  
64 participants younger than 50 years. Female sex, younger age, higher education, and receipt of  
65 mRNA-1273 were associated with reporting adverse effects. Compared to JNJ-78436735  
66 recipients, a higher proportion of mRNA vaccine recipients agreed that vaccination is important  
67 (87.5% vs. 28.5%), and trusted public health authorities (80.2% vs. 30.3%) and pharmaceutical  
68 companies (71.7% vs. 23.6%).

69

70 **Conclusions and Relevance:** Our population-based cohort provided real-world data on self-  
71 reported adverse effects following SARS-CoV-2 vaccination and highlights the importance of  
72 transparent communication regarding adverse effects and building trust in public health  
73 authorities to ensure successful future vaccination campaigns.

74

## 75 **Introduction**

76 Beginning with the first vaccinations against SARS-CoV-2 in December 2020, the largest global  
77 vaccination campaign in recent history captured the public and professional attention for  
78 months. Apart from the obvious focus on efficacy, concerns about vaccine-related adverse  
79 effects dominated the professional and public discourse during the campaign. The fast-track  
80 authorization of the technologically new mRNA vaccines BNT162b2 (Pfizer-BioNTech) and  
81 mRNA1273 (Moderna) in some countries and misinformation contributed to vaccine skepticism  
82 and hesitancy.[1-5] This highlights the importance of understanding and accurately  
83 communicating information regarding adverse effects, including vaccine safety profiles, to  
84 improve vaccine confidence and uptake.

85 The current body of evidence on adverse effects following SARS-CoV-2 vaccination consists  
86 mostly of data reported in randomized clinical trials (RCTs) and reports to government-based  
87 surveillance systems, such as the European EudraVigilance, US VAERS (Vaccine Adverse Event  
88 Reporting System), or Swiss ELViS (Electronic Vigilance System). Adverse effects reported in RCTs  
89 have been primarily mild and self-limited,[6, 7] with systemic reactions (e.g. fatigue, headache,  
90 pain) and local injection site reactions (e.g. pain, erythema, swelling) being the most frequent.[8-  
91 10] In contrast, severe adverse effects accounted for a significantly higher proportion of reports  
92 in governmental surveillance systems.[11-13] This was to be expected as reporting to surveillance  
93 systems is subject to several biases including underreporting of mild and common adverse effects  
94 and increased reporting of those which are severe or widely reported in the media.[14, 15]  
95 Although RCTs provided important evidence on the safety of individual vaccines, they offered  
96 little side-by-side comparisons. Furthermore, RCTs yield data collected on selected populations

97 raising the issue of how well this data correlates to “real-world” experiences. The few studies  
98 eliciting patient-reported symptoms following different vaccines in real-world settings often had  
99 cross-sectional designs and were conducted among very specific groups such as healthcare  
100 workers or university students, which may not be representative of the general population.[6, 7]  
101 In this population-based study, we aimed to deliver a comprehensive comparative analysis of  
102 self-reported adverse effects up to 12 weeks after receipt of three SARS-CoV-2 vaccines approved  
103 in Switzerland in 2021. Further objectives were to examine the general perception and attitudes  
104 of individuals regarding SARS-CoV-2 vaccination and their compliance with recommended public  
105 health measures. Thereby, we aim to improve our understanding of the adverse health effects  
106 experienced following vaccination in the general population to provide an evidence base for  
107 future vaccination campaigns in view of the likely implementation of additional booster  
108 vaccinations and updated SARS-CoV-2 vaccines.

109

## 110 **Methods**

### 111 **Study design, participants, and recruitment**

112 This study is based on the Zurich SARS-CoV-2 Vaccine Cohort, an ongoing prospective population-  
113 based cohort study. We recruited participants between March 10, 2021, and January 27, 2022,  
114 at the University of Zurich’s (UZH) vaccination center, the reference center for the Canton of  
115 Zurich, Switzerland. All individuals scheduled to receive one of the SARS-CoV-2 vaccines approved  
116 in Switzerland in 2021, BNT162b2 (Pfizer-BioNTech), mRNA1273 (Moderna), or JNJ-78436735  
117 (Johnson & Johnson), were screened for eligibility. Eligibility criteria were being 18 years or older,

118 being able to follow study procedures, having sufficient knowledge of the German language and  
119 residing in the Canton of Zurich. We excluded individuals who had already received a first dose  
120 of a SARS-CoV-2 vaccine. A daily age-stratified (18-64 years, 65 years or older) random sample  
121 was selected separately for each approved vaccine from all eligible individuals belonging to the  
122 following vaccination groups as defined by the Canton of Zurich [16, 17]: “Over 75 years”, “over  
123 65 years”, “between 50–64 years”, and “between 18–49 years”. We excluded individuals  
124 belonging to groups specific for “healthcare workers”, “caretakers of high-risk patients”,  
125 “individuals living in communal facilities”, and “individuals with the highest risk diseases” to  
126 ensure that that our sample was representative of the general population.[18, 19] Randomly  
127 selected individuals were then invited to participate in our study. We obtained written informed  
128 consent from all participants. We were unable to reach the desired sample size for JNJ-78436735  
129 recipients 65 years or older, due to limited demand.

130 The study protocol was prospectively registered on the International Standard Randomized  
131 Controlled Trial Number Registry (ISRCTN 15499304) and approved by the ethics committee of  
132 the Canton of Zurich (BASEC 2021-00273).

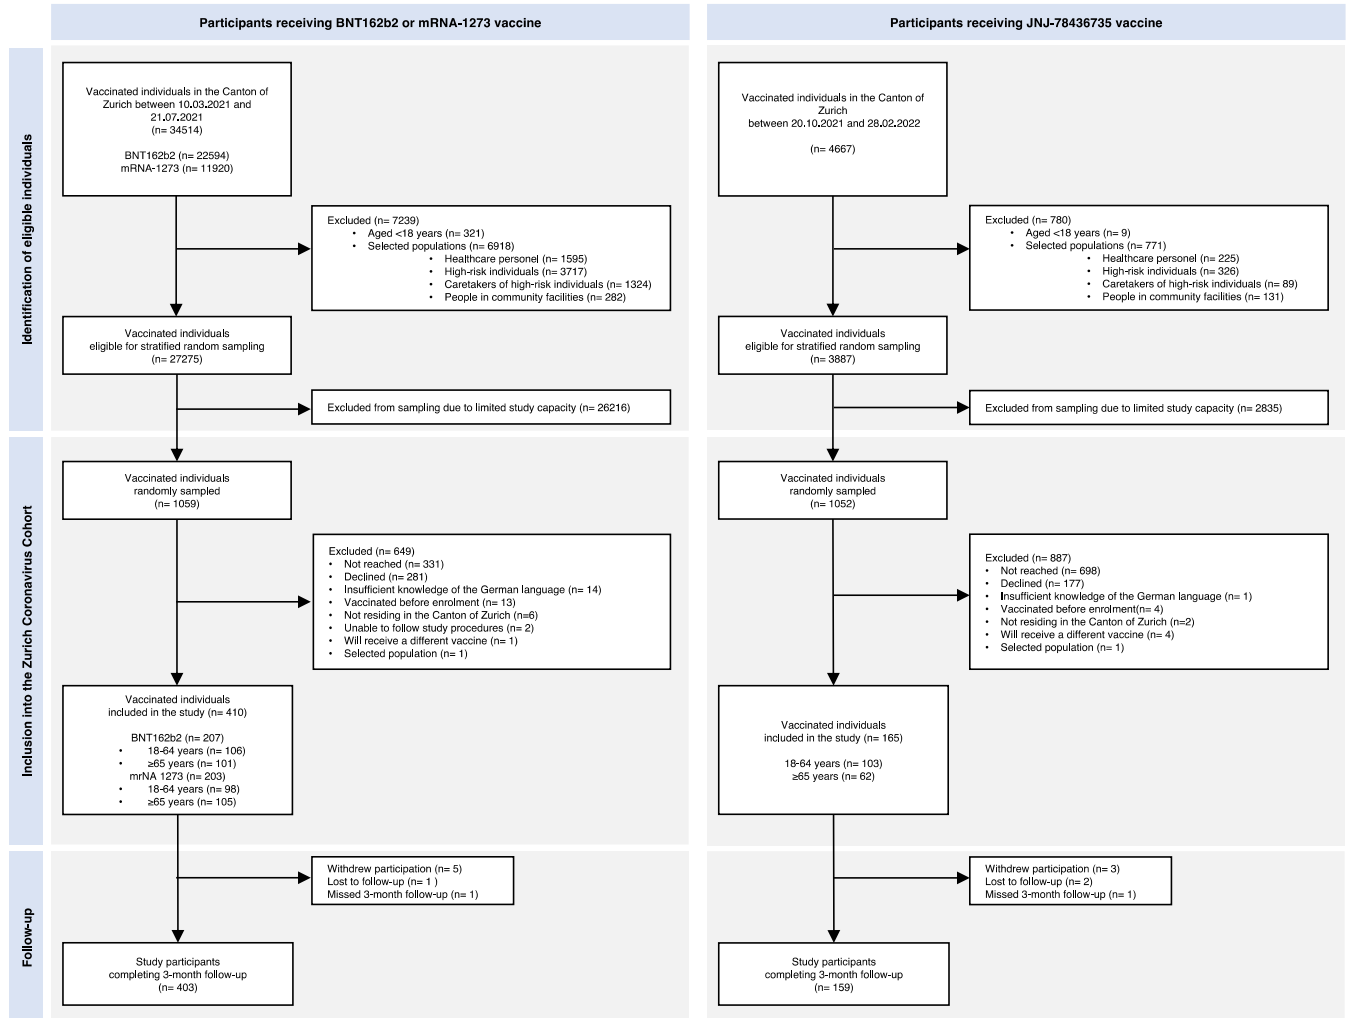

133

134 **Figure 1.** Recruitment of study cohort

135

### 136 **Data sources and measurements**

137 Upon enrolment, all participants completed a baseline questionnaire including questions on their  
 138 sociodemographics, medical and smoking history, SARS-CoV-2 related information such as prior  
 139 infections, perceptions and attitudes regarding vaccination, trust in public health authorities and  
 140 pharmaceutical companies, and compliance with recommended public health measures  
 141 (including use of the SwissCovid digital proximity tracing app). Perception, attitude, and



142 compliance questions were collected using a numerical scale (0 “Very low opinion”, to 100 “Very  
143 high opinion” for perception), or a 5-item Likert (ranging from “Strongly disagree” to “Strongly  
144 agree” for trust-related statements, and from “Never/Impossible” to “Always” for statements on  
145 compliance with public health measures). We pooled BNT162b2 and mRNA-1273 recipients into  
146 one “mRNA vaccine” group since they expressed similar perceptions towards vaccination and  
147 compliance with recommended measures (Supplement 1).

148 We provided participants with a paper symptom diary and instructed them to record any adverse  
149 effect they experienced during 12 weeks after vaccination, as free text, including start and end  
150 dates, perceived severity (on a 5-item Likert scale, ranging from “Very mild” to “Very severe”),  
151 and consequences of the adverse effects (i.e., self-medication, need for healthcare services, or  
152 hospitalizations). Symptom diaries were collected at the 12-week follow-up visit. Participants  
153 received additional electronic questionnaires at 4, 6, and 12 weeks, in which they were asked to  
154 report any positive SARS-CoV-2 polymerase chain reaction (PCR) or rapid antigen tests. We  
155 excluded all reported adverse effects starting within three days before and at any timepoint after  
156 positive SARS-CoV-2 tests to ensure that reported symptoms were related to vaccination rather  
157 than infection. To determine the proportion of participants with past SARS-CoV-2 infection, we  
158 measured participants’ anti-SARS-CoV-2 Spike (S)-IgA and IgG antibodies at baseline using a  
159 highly sensitive and specific Luminex technology-based assay.[20]

160 We collected and managed all study data using the Research Electronic Data Capture (REDCap)  
161 system.[21, 22]

162

163 **Outcomes**

164 Our primary outcomes included period prevalence, onset, duration, and severity of self-reported  
165 adverse effects over 12 weeks following vaccination, with a specific focus on the proportion of  
166 participants reporting allergic reactions, menstrual irregularities, or cardiac adverse effects, or  
167 requiring hospitalization. Secondary outcomes included risk factors associated with adverse  
168 effect reports, general perceptions and attitudes regarding vaccination, trust in public health  
169 authorities and pharmaceutical companies, and compliance with recommended public health  
170 measures.

171

172 **Statistical Analysis**

173 We descriptively analyzed the characteristics and outcomes of interest for the overall cohort and  
174 for each of the three vaccine groups. Continuous variables are reported as median with  
175 interquartile range (IQR); categorical or ordinal variables as frequencies (N) and percentages  
176 (%). We coded adverse effect data reported by participants in the symptom diary according to  
177 the Medical Dictionary for Regulatory Activities (MedDRA) hierarchical terminology (Supplement  
178 2).[23] The self-reported adverse effects were translated from German to the closest matching  
179 MedDRA “low level term”. All corresponding higher-level terms were included in the database, a  
180 highest level of coding was added, labelling each adverse effect either as “local” or “systemic”.  
181 We explored associations of several predictor variables on the outcome of reporting one or more  
182 adverse effects using a multivariable logistic regression model. Age, sex, vaccine type and  
183 education were included a priori variables in the model based on findings from other studies.[6]

184 Results are presented as odds ratios (OR) with their 95% confidence intervals (CI) and two-sided  
185 p-value. All analyses were performed using R (version 4.1.2).

186

## 187 **Results**

### 188 **Cohort characteristics**

189 Of our 575 participants, 323 participants (56.2%) were female, and the median age was 59 years  
190 (IQR 41 to 70) (Table 1). 411 (71.5%) participants received a mRNA-based vaccine (2 doses 3 to 4  
191 weeks apart, 36.2% BNT162b2 and 35.3% mRNA-1273) and 164 (28.5%) received a vector-based  
192 vaccine (1 dose, JNJ-78436735). The proportion of participants with a higher level of education  
193 (39.8% vs 61.8%) was lower among JNJ-78436735 recipients compared to mRNA vaccine  
194 recipients.

195 37 participants (6.4%) reported ever having a positive SARS-CoV-2 test prior to vaccination, with  
196 a higher proportion among JNJ-78436735 recipients (9.7% vs 6.4% of mRNA-1273 and 3.7% of  
197 BNT162b2 recipients). 19 (9.2%) BNT162b2 recipients, 24 (11.8%) mRNA-1273 recipients and 29  
198 (17.6%) JNJ-78436735 recipients tested seropositive for anti-SARS-CoV-2 S-IgA or -IgG before  
199 receiving the first vaccination dose.

200

201 **Table 1.** Demographic and clinical characteristics of study population

|                                                                                            | <b>BNT162b2</b><br><b>(Pfizer/BioNTech)</b> | <b>mRNA-1273</b><br><b>(Moderna)</b> | <b>JNJ-78436735</b><br><b>(Johnson &amp; Johnson)</b> | <b>Overall</b> |
|--------------------------------------------------------------------------------------------|---------------------------------------------|--------------------------------------|-------------------------------------------------------|----------------|
|                                                                                            | <b>(N=207)</b>                              | <b>(N=203)</b>                       | <b>(N=165)</b>                                        | <b>(N=575)</b> |
| <b>Age, median (IQR) -in years</b>                                                         | 59 (36 to 75)                               | 65 (42.5 to 69)                      | 58 (45 to 70)                                         | 59 (41 to 70)  |
| <b>Age distribution - no. of participants (%)</b>                                          |                                             |                                      |                                                       |                |
| <65 years                                                                                  | 106 (51.2%)                                 | 99 (48.8%)                           | 103 (62.4%)                                           | 308 (53.6%)    |
| ≥65 years                                                                                  | 101 (48.8%)                                 | 104 (51.2%)                          | 62 (37.6%)                                            | 267 (46.4%)    |
| <b>Female sex - no. of participants (%)</b>                                                | 115 (55.6%)                                 | 120 (59.1%)                          | 88 (53.3%)                                            | 323 (56.2%)    |
| <b>Presence of at least one preexisting medical condition (%)</b>                          | 80 (40.8%)                                  | 78 (42.2%)                           | 64 (43.2%)                                            | 222 (42.0%)    |
| <b>Highest educational level - no. of participants (%)</b>                                 |                                             |                                      |                                                       |                |
| None or mandatory school                                                                   | 9 (4.4%)                                    | 4 (2.0%)                             | 7 (4.3%)                                              | 20 (3.5%)      |
| Vocational training or specialized baccalaureate                                           | 71 (34.5%)                                  | 72 (35.6%)                           | 91 (55.8%)                                            | 234 (41.0%)    |
| Higher technical school or college                                                         | 46 (22.3%)                                  | 44 (21.8%)                           | 40 (24.5%)                                            | 130 (22.8%)    |
| University                                                                                 | 80 (38.8%)                                  | 82 (40.6%)                           | 25 (15.3%)                                            | 187 (32.7%)    |
| Missing                                                                                    | 1 (0.5%)                                    | 1 (0.5%)                             | 2 (1.2%)                                              | 4 (0.7%)       |
| <b>Reported adverse effects - no. of participants (%)</b>                                  | 160 (77.3%)                                 | 180 (88.7%)                          | 114 (69.1%)                                           | 456 (79.3%)    |
| <b>Tested seropositive for anti-SARS-CoV-2 S-IgA at baseline - no. of participants (%)</b> | 12 (5.8%)                                   | 14 (6.9%)                            | 20 (12.1%)                                            | 46 (8.0%)      |
| <b>Tested seropositive for anti-SARS-CoV-2 S-IgG at baseline - no. of participants (%)</b> | 15 (7.2%)                                   | 19 (9.4%)                            | 24 (14.5%)                                            | 58 (10.1%)     |

|                                                                                                                                           |            |            |            |            |
|-------------------------------------------------------------------------------------------------------------------------------------------|------------|------------|------------|------------|
| <b>Reported positive SARS-CoV-2 test prior to baseline - no. of participants (%)</b>                                                      | 8 (3.9%)   | 13 (6.4%)  | 16 (9.7%)  | 37 (6.4%)  |
| <b>SARS-CoV-2 Infection prior to baseline (self-reported infection or tested seropositive)- no. of participants (%)</b>                   | 21 (10.1%) | 28 (13.8%) | 31 (18.8%) | 80 (13.9%) |
| <b>Tested positive for anti-SARS-CoV-2 S-IgA or IgG at baseline with no report of prior SARS-CoV-2 Infection- no. of participants (%)</b> | 13 (6.3%)  | 15 (7.4%)  | 15 (9.1%)  | 43 (7.5%)  |

202

### 203 **Frequency and characteristics of adverse effects**

204 Overall, 79.0% (N= 454) of all participants reported at least one adverse effect up to three months  
205 following vaccination, with a total of 2397 reported adverse effects. The highest proportion of  
206 participants with adverse effects after vaccination was among mRNA-1273 recipients (88.7%,  
207 N=180) compared to BNT162b2 (77.3%, N=160) and JNJ-78436735 (69.1%, N=114) recipients.  
208 Based on a multivariable logistic regression model, we found strong to very strong evidence that  
209 female sex (OR=4.05 (95% CI: 2.33 to 7.3), p<0.001), higher education levels (vs. none or  
210 mandatory school, OR=6.26 (1.86 to 21.2), p=0.003) and receiving mRNA-1273 (vs. BNT162b2,  
211 OR=2.38 (1.22 to 4.8), p=0.013) were associated with adverse effect reports. There was weak  
212 evidence that younger age (<65 vs. ≥65 years, OR=1.65 (0.96 to 2.9), p=0.072) was associated  
213 with adverse effects. We found no evidence that JNJ-78436735 (vs. BNT162b2), preexisting  
214 conditions, low opinion (opinion value <50) about vaccination and SARS-CoV-2 infections prior to  
215 vaccination were associated with adverse effects (Supplement 3).

216 More participants reported systemic (71.7%, N=412) than local adverse effects (54.8%, N=315).  
217 Among mRNA vaccine recipients, the proportion of systemic among all adverse effects increased  
218 after the 2<sup>nd</sup> dose (63.9% to 77.2% in BNT162b2 and 59.1% to 78.0% in mRNA-1273 recipients,  
219 Supplement 4). The most common adverse effect mentioned by mRNA vaccine recipients was  
220 local pain (54.1% of BNT162b2 and 69.5% of mRNA-1273 recipients), followed by asthenia  
221 (fatigue; 38.7% of BNT162b2 and 44.8% of mRNA-1273 recipients). JNJ-78436735 recipients most  
222 frequently reported headache (36.4%), followed by local pain (30.9%) and asthenia (30.9%).  
223 Other commonly reported adverse effects included nausea, vertigo, and sore throat (all >5%). Of  
224 our participants, 0.4% (n=2) (one BNT162b2 and one mRNA-1273 recipient) reported allergic  
225 reactions. Adverse effects affecting menstruation were reported by 5 out of 47 (10.6%) female  
226 participants younger than 50 among BNT162b2 recipients, 4 out of 42 (9.5%) among mRNA-1273  
227 recipients and 2 out of 31 (6.5%) among JNJ-78436735 recipients (six participants reported cycle  
228 irregularities, three heavy menstrual bleeding, three intermenstrual bleeding). Tachycardia or  
229 palpitations were reported by seven (1.2%) participants, four mRNA-1273, two JNJ-78436735 and  
230 one BNT162b2 recipient. One BNT162b2 recipient reported pericardial effusion and atrial  
231 fibrillation after the second dose.  
232 Most adverse effects (83.9%) occurred in the first week following vaccination, 67.9% within 24  
233 hours. Participants reported that adverse effects lasted for 3.9 days on average, and most  
234 resolved within 3 (76.3%) days. Asthenia, extremity pain, and cough were most frequently  
235 reported to last longer than a week. Adverse effect onset and duration were similar across the  
236 three vaccines (Figure 2A, Supplement 5).

237 The perceived severity of most adverse effects was mild (49.0%) or moderate (36.2%).  
238 Meanwhile, 14.7% were described as severe (13.4%) or very severe (1.3%), with the highest  
239 proportion of severe to very severe adverse effects reported after JNJ-78436735 (18.3% vs 16.1%  
240 after mRNA-1273, 9.4% after BNT162b2). Asthenia (13.1%), headache (12.8%) and pain (9.4%)  
241 were mostly reported as severe or very severe adverse effects. Hospitalization due to reported  
242 adverse effects was reported by 0.7% (n=4) of participants (two BNT162b2 recipients with loss of  
243 consciousness and bullous pemphigoid, one mRNA-1273 recipient with retinal detachment and  
244 one JNJ-78436735 recipient with meningitis).

245 Most reported adverse effects resolved spontaneously (Figure 2C). However, participants  
246 reported using self-prescribed medications (e.g., Paracetamol or Ibuprofen) or seeking  
247 consultation with a healthcare provider for 448 (18.7%) and 84 (3.5%) of the adverse effects,  
248 respectively.

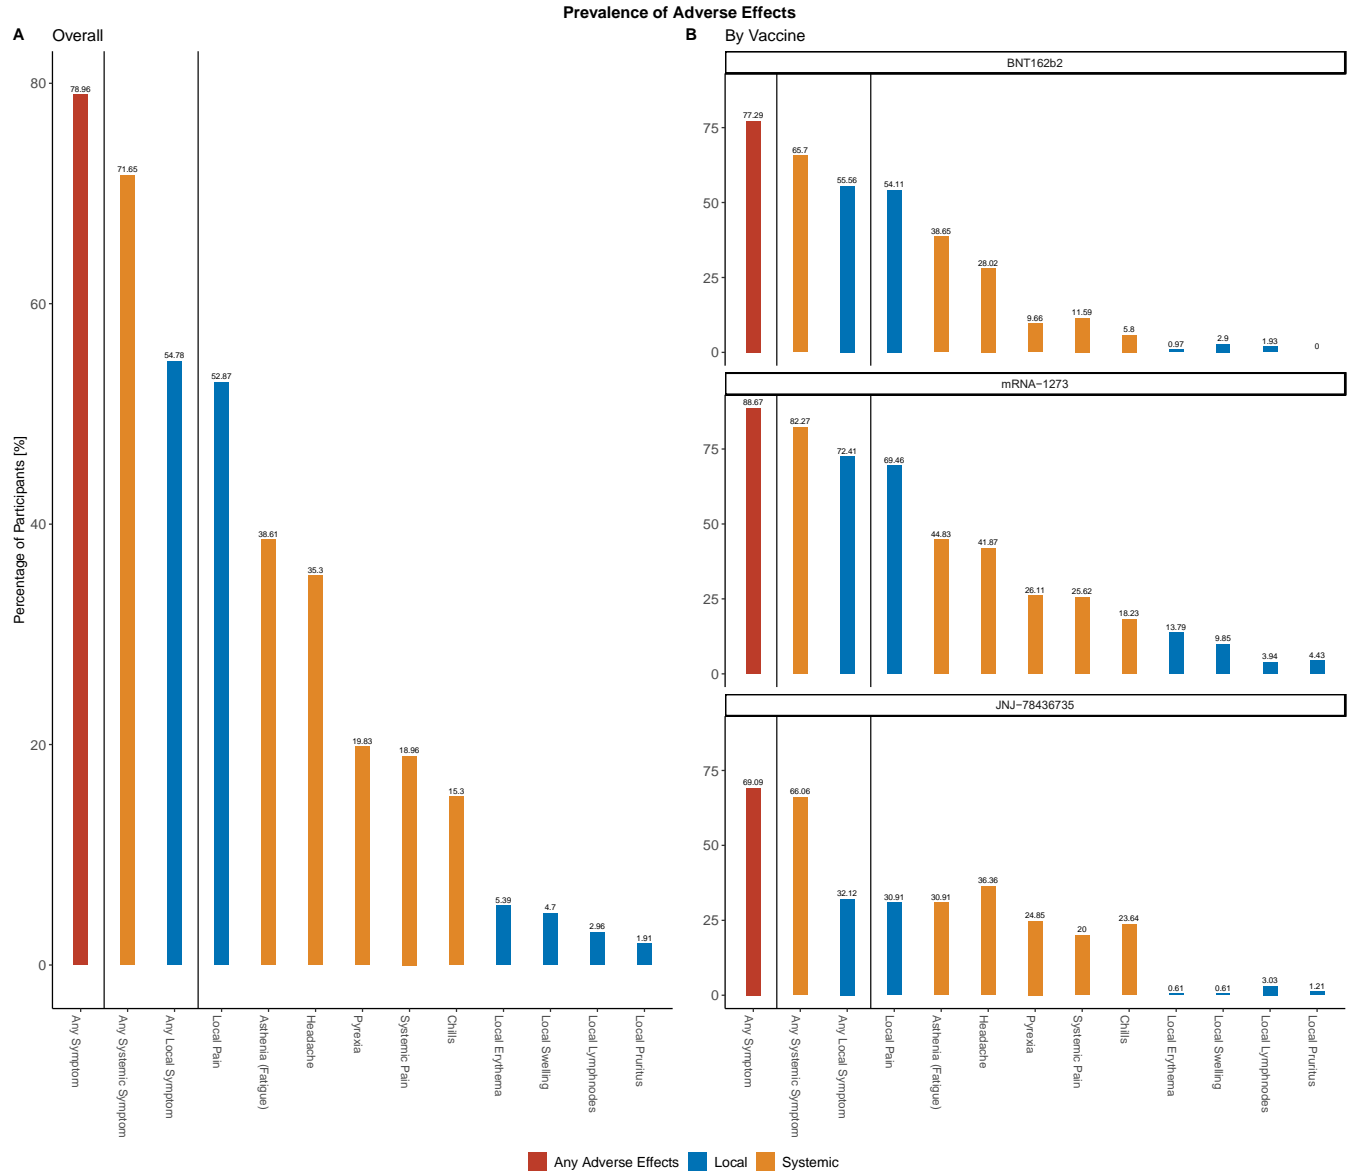

249

250 **Figure 2.** Frequency of any, local and systemic adverse effects. Panel A shows five most common systemic and local  
 251 adverse effects in overall sample (N=575). Panel B shows adverse effects by vaccine type (BNT162b2 N=208, mRNA-  
 252 1273 N=203, JNJ-78436735 N=164).



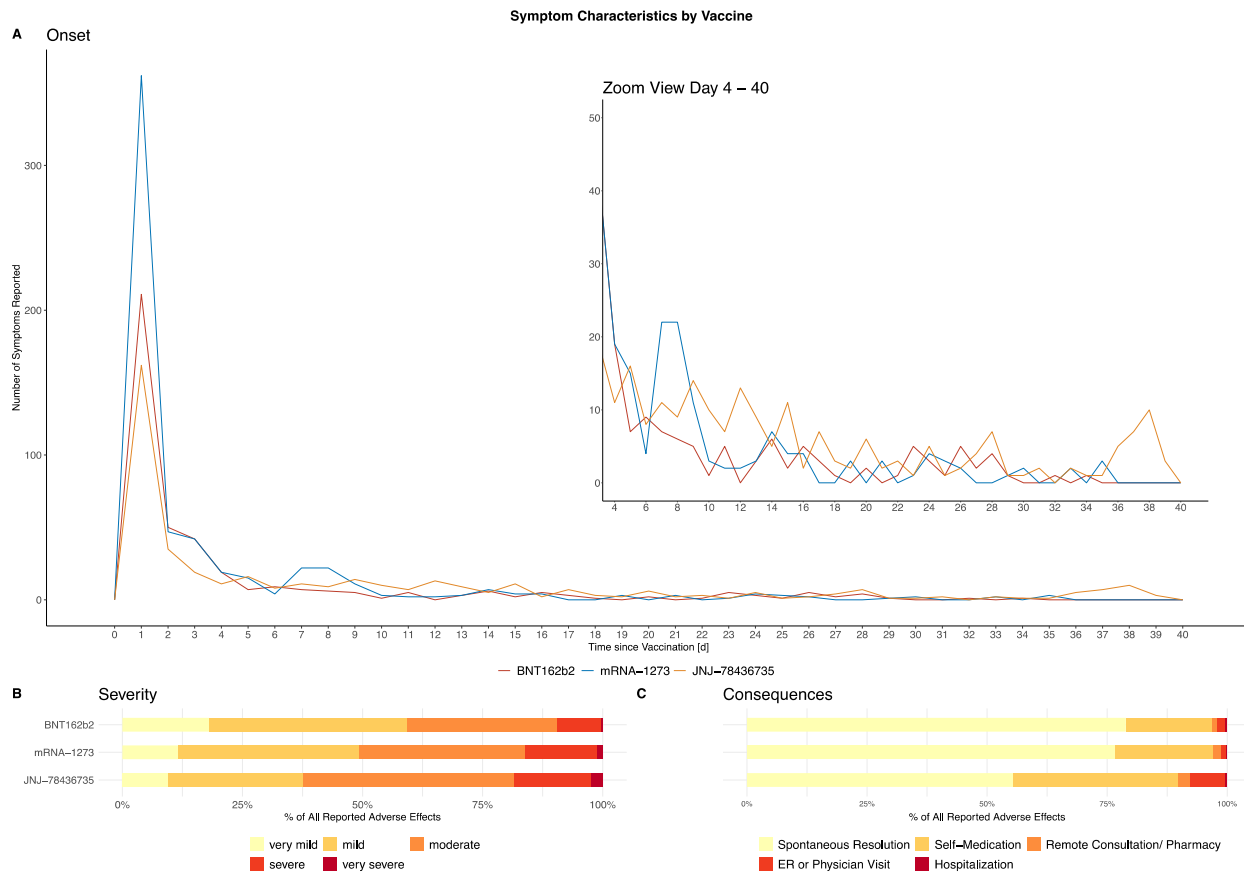

253  
254 **Figure 3.** Characteristics of self-reported adverse effects. Panel A shows the time of adverse effect onset by vaccine,  
255 panel B perceived adverse effect severity by vaccine and panel C the consequences of adverse effects by vaccine.  
256 (ER: Emergency Room)

257  
258 **Perceptions of vaccination and compliance with recommended public health measures**

259 More mRNA vaccine recipients (87.5%) agreed completely or in part with the statement that it  
260 was important to be vaccinated compared to 28.5% of JNJ-78436735 recipients. Similarly, more  
261 mRNA vaccine recipients felt that vaccines were a part of a healthy lifestyle (63.6% vs. 28.9% of  
262 JNJ-78436735 recipients). Trust in public health authorities (80.2% vs. 30.3%) and pharmaceutical  
263 companies (71.7% vs. 23.6%) was higher among mRNA vaccine recipients compared to JNJ-

264 78436735 recipients. Both groups felt they had sufficient understanding of how the vaccine  
 265 helped the body fend off infectious diseases (89.3% mRNA vaccine recipients vs. 62.4% JNJ-  
 266 78436735 recipients) and reported similar compliance with recommended public health  
 267 measures (Figure 3B). Use of the SwissCovid digital proximity tracing app was higher among  
 268 mRNA vaccine recipients compared to JNJ-78436735 recipients (53.2% vs 27.4%).

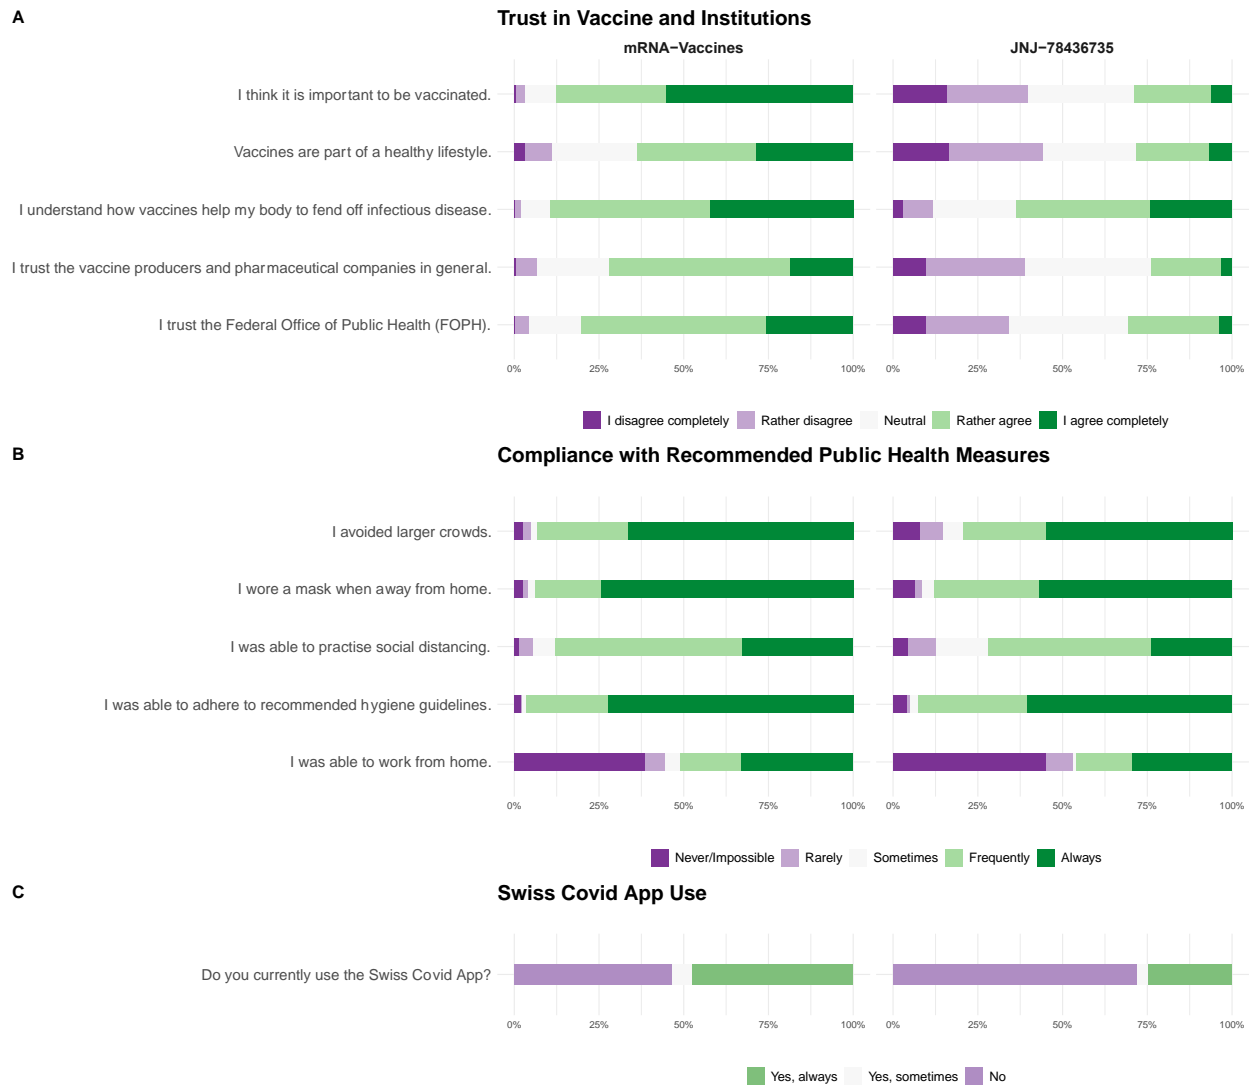

269  
 270 **Figure 4.** Perception of vaccination and compliance with recommended public health measures.  
 271

## 272 **Discussion**

273 In this population-based cohort of 575 individuals who received a SARS-CoV-2 vaccine and were  
274 followed-up over 12 weeks, participants commonly reported adverse effects, namely local pain,  
275 fatigue, headache, and fever. Most adverse effects were mild to moderate and resolved within  
276 three days. Allergic reactions (0.4%) and adverse effects requiring hospitalization (0.7%) were  
277 rare. Around 9% of female participants younger than 50 reported menstrual cycle changes, more  
278 frequently among mRNA vaccine recipients. Female sex, receiving mRNA-1273, higher education  
279 and younger age were associated with experiencing adverse effects. JNJ-78436735 recipients less  
280 frequently perceived vaccination to be important and had lower trust in public health authorities  
281 and pharmaceutical companies compared to mRNA vaccine recipients. There were no differences  
282 between vaccine groups in compliance with preventive public health measures.

283 Our results on the prevalence and severity of adverse effects are in line with previously  
284 reported data from RCTs and other observational studies.[6, 9, 10, 24-26] In an online survey  
285 among individuals vaccinated with either BNT162b2, mRNA-1273, or JNJ-78436735, Beatty et  
286 al. reported that 80.3% of participants experienced adverse effects, with comparable estimates  
287 for each vaccine type.[6] Our data also matches the prevalence published in the RCTs for each  
288 vaccine individually.[8-10]. The proportion of adverse effects that were self-assessed to be  
289 severe or required hospitalization in our study (14.8%) was well below that of Swiss and  
290 European governmental surveillance systems (37.9% in Swiss ELViS).[11, 12] US surveillance  
291 reports also stated higher estimates of serious adverse events based on hospitalization rates,  
292 serious illness and deaths (9.2% vs. our 0.7%).[13] These higher estimates from governmental  
293 reporting systems are likely related to the underreporting of mild symptoms and underscore

294 the importance of “real-world” data.[14, 15] There is wide variation in reports on prevalence of  
295 anaphylaxis and severe allergic reactions ranging from 0.03% to 3%, due to differing  
296 definitions.[6, 27, 28] In our study, two (0.4%) participants reported allergic reactions, without  
297 requiring medical attention.

298 Our follow-up over 12 weeks allowed us to assess adverse effects that occur with some delay,  
299 such as menstrual changes reported in 9% of female participants younger than 50 years. Few  
300 studies have described menstrual irregularities following SARS-CoV-2 vaccination with  
301 prevalence ranging between 0.3% and 46%.[29, 30] This large variability and the high prevalence  
302 (37.8%) of menstrual irregularities in the general population regardless of vaccination underscore  
303 the challenge of attributing changes in the menstrual cycle to vaccination.[31] Further research  
304 is needed on the influence of SARS-CoV-2 vaccination on menstruation and the general impact  
305 of vaccination on female recipients, as we and others observed that female recipients were  
306 generally more likely to experience adverse effects.[32-35]

307 We also found that participants who were younger than 65 years and received mRNA-1273 were  
308 more likely to report adverse effects possibly due to stronger immune responses among these  
309 groups.[6, 13, 26] Similarly, other studies have found evidence that SARS-CoV-2 infections prior  
310 to vaccination may be associated with adverse effects reports due to increased  
311 immunogenicity.[6, 7] While we found that individuals with prior SARS-CoV-2 infections were 1.8  
312 times more likely to report adverse effects compared to those without, the findings were not  
313 statistically significant, potentially due to insufficient power in our study.

314 mRNA vaccine recipients trusted vaccines in general and thus were mostly motivated to be  
315 vaccinated as soon as SARS-CoV-2 vaccines became available. JNJ-78436735 recipients were

316 more hesitant and waited for JNJ-78436735's introduction to Switzerland, resulting in a higher  
317 proportion of individuals with infections prior to vaccination compared to mRNA vaccine  
318 recipients. Other studies describe these concerns about the rapid development and fears of  
319 adverse effects to be among the main reasons to wait for non-mRNA-based vaccines or other  
320 alternatives.[36-38] General skepticism and the presence of nocebo effects , as demonstrated by  
321 a Amanzio et al, may have translated into a higher proportion of JNJ-78436735 recipients  
322 perceiving adverse effects as severe. [38-40] Increasing awareness of these nocebo responses  
323 and using positive framing around the low risk of severe adverse effects may contribute to  
324 improving vaccine acceptance.

325 This study provided evidence from a representative cohort recruited from the general population  
326 and followed-up over a 12-week period. Data collected through symptom diaries and adverse  
327 effect coding according to MedDRA terms generated a comprehensive dataset allowing a  
328 comparative analysis of three common SARS-CoV-2 vaccines.

329 However, there are several limitations to our study. First, self-selection bias may have occurred  
330 if individuals who are more health literate or less hesitant participated in our study, leading to  
331 overestimations of trust in public health authorities and more positive perceptions of vaccines.  
332 However, we consider the data on the prevalence of adverse effects as broadly representative.  
333 Second, our data is self-reported. While this allows for an accurate description of vaccine  
334 recipients' experiences, it is subjective and no verification of the relation of adverse effects and  
335 vaccination by a healthcare provider was possible. Third, the absolute numbers of reports for  
336 some adverse effects when analyzed individually are relatively small (e.g., menstrual changes).  
337 Finally, our analysis was restricted to basic immunization of the three SARS-CoV-2 vaccines

338 approved in Switzerland at the time of study conduct. Further research on adverse effects  
339 occurring after booster vaccinations, other types of vaccines and combinations of different  
340 vaccines is needed.

341

## 342 **Conclusion**

343 This study demonstrates the safety of three SARS-CoV-2 vaccines in a representative population-  
344 based cohort and provides real-world estimates on adverse effect prevalence after vaccination.  
345 Thereby, we importantly extend the evidence base for health-care providers to answer many of  
346 the questions of individuals seeking vaccination. While further evidence on adverse effects after  
347 booster vaccination and other vaccine types is required, our study suggests that transparent  
348 communication regarding adverse effects and building trust in public health authorities are  
349 pivotal future vaccination campaigns' success.

350

## 351 **Funding**

352 This work was supported by funds received within the Corona Immunitas research network, of  
353 which this study is part of. The Corona Immunitas research network is coordinated by the Swiss  
354 School of Public Health (SSPH+) and funded by fundraising of SSPH+ including funds of the Swiss  
355 Federal Office of Public Health and private funders (ethical guidelines for funding stated by  
356 SSPH+ were respected), by funds of the cantons of Switzerland (Vaud, Zurich, and Basel), and by  
357 institutional funds of the Universities. Additional funding specific for this cohort was received  
358 from the Uniscientia Foundation (Switzerland). TB received funding from the European Union's  
359 Horizon 2020 research and innovation programme under the Marie Skłodowska-Curie grant  
360 agreement No 801076, through the SSPH+ Global PhD Fellowship Programme in Public Health  
361 Sciences (GlobalP3HS) of the SSPH+. DM received funding by the UZH Postdoc Grant, grant no.  
362 FK-22-053.

363

## 364 **Acknowledgements**

365 The authors thank the study administration team and the team from the University of Zurich's  
366 (UZH) vaccination center, the reference center for the Canton of Zurich, Switzerland, for their  
367 dedicated support of the study. They also thank the study participants for their valuable  
368 contribution to this project.

369

## 370 **Conflict of Interest**

371 The authors of this manuscript state no conflict of interest.

372 **References:**

- 373 1. O'Callaghan KP, Blatz AM, Offit PA. Developing a SARS-CoV-2 Vaccine at Warp Speed.  
374 JAMA **2020**; 324(5): 437-8.
- 375 2. US Food and Drug Administration. Pfizer-BioNTech COVID-19 vaccine emergency use  
376 authorization. Available at: <https://www.fda.gov/media/144412/download>. Accessed  
377 June 22.
- 378 3. US Food and Drug Administration. Moderna COVID-19 vaccine emergency use  
379 authorization. Available at: <https://www.fda.gov/media/144636/download>. Accessed  
380 June 22.
- 381 4. Khubchandani J, Sharma S, Price JH, Wiblishauser MJ, Sharma M, Webb FJ. COVID-19  
382 Vaccination Hesitancy in the United States: A Rapid National Assessment. J Community  
383 Health **2021**; 46(2): 270-7.
- 384 5. Cascini F, Pantovic A, Al-Ajlouni Y, Failla G, Ricciardi W. Attitudes, acceptance and  
385 hesitancy among the general population worldwide to receive the COVID-19 vaccines and  
386 their contributing factors: A systematic review. EClinicalMedicine **2021**; 40: 101113.
- 387 6. Beatty AL, Peyser ND, Butcher XE, et al. Analysis of COVID-19 Vaccine Type and Adverse  
388 Effects Following Vaccination. JAMA Netw Open **2021**; 4(12): e2140364.
- 389 7. Mathioudakis AG, Ghrew M, Ustianowski A, et al. Self-Reported Real-World Safety and  
390 Reactogenicity of COVID-19 Vaccines: A Vaccine Recipient Survey. Life (Basel) **2021**; 11(3).
- 391 8. Sadoff J, Gray G, Vandebosch A, et al. Safety and Efficacy of Single-Dose Ad26.COV2.S  
392 Vaccine against Covid-19. N Engl J Med **2021**; 384(23): 2187-201.



- 393 9. Polack FP, Thomas SJ, Kitchin N, et al. Safety and Efficacy of the BNT162b2 mRNA Covid-  
394 19 Vaccine. *N Engl J Med* **2020**; 383(27): 2603-15.
- 395 10. Baden LR, El Sahly HM, Essink B, et al. Efficacy and Safety of the mRNA-1273 SARS-CoV-2  
396 Vaccine. *N Engl J Med* **2021**; 384(5): 403-16.
- 397 11. Swissmedic. Reports of suspected adverse reactions to COVID-19 vaccines in Switzerland  
398 – update 26. Available at:  
399 [https://www.swissmedic.ch/swissmedic/en/home/news/coronavirus-covid-19/covid-](https://www.swissmedic.ch/swissmedic/en/home/news/coronavirus-covid-19/covid-19-vaccines-safety-update-16.html)  
400 [19-vaccines-safety-update-16.html](https://www.swissmedic.ch/swissmedic/en/home/news/coronavirus-covid-19/covid-19-vaccines-safety-update-16.html). Accessed 19 August.
- 401 12. European Medicines Agency. Safety of COVID-19 Vaccines. Available at:  
402 [https://www.ema.europa.eu/en/human-regulatory/overview/public-health-](https://www.ema.europa.eu/en/human-regulatory/overview/public-health-threats/coronavirus-disease-covid-19/treatments-vaccines/vaccines-covid-19/safety-covid-19-vaccines)  
403 [threats/coronavirus-disease-covid-19/treatments-vaccines/vaccines-covid-19/safety-](https://www.ema.europa.eu/en/human-regulatory/overview/public-health-threats/coronavirus-disease-covid-19/treatments-vaccines/vaccines-covid-19/safety-covid-19-vaccines)  
404 [covid-19-vaccines](https://www.ema.europa.eu/en/human-regulatory/overview/public-health-threats/coronavirus-disease-covid-19/treatments-vaccines/vaccines-covid-19/safety-covid-19-vaccines). Accessed August 24.
- 405 13. Gee J, Marquez P, Su J, et al. First Month of COVID-19 Vaccine Safety Monitoring - United  
406 States, December 14, 2020-January 13, 2021. *MMWR Morb Mortal Wkly Rep* **2021**; 70(8):  
407 283-8.
- 408 14. Shimabukuro TT, Nguyen M, Martin D, DeStefano F. Safety monitoring in the Vaccine  
409 Adverse Event Reporting System (VAERS). *Vaccine* **2015**; 33(36): 4398-405.
- 410 15. Rosenthal S, Chen R. The reporting sensitivities of two passive surveillance systems for  
411 vaccine adverse events. *Am J Public Health* **1995**; 85(12): 1706-9.
- 412 16. Canton Zurich. Coronavirus vaccination. Available at:  
413 <https://www.zh.ch/en/gesundheit/coronavirus/coronavirus-impfung.html>. Accessed  
414 13th July.

- 415 17. TravelClinic.ch. Impfgruppen. Available at: [travelclinic.ch/wp-](https://travelclinic.ch/wp-content/uploads/Impfgruppen.pdf)  
416 [content/uploads/Impfgruppen.pdf](https://travelclinic.ch/wp-content/uploads/Impfgruppen.pdf). Accessed 13th July.
- 417 18. Federal Office of Public Health. Kategorien besonders gefährdeter Personen.  
418 [bag.admin.ch](https://www.bag.admin.ch/bag/admin/ch): Federal Office of Public Health,, **2022** 10.08.2022.
- 419 19. Federal Office of Public Health. Covid-19-Impfstrategie (Stand 05.07.2022). [bag.admin.ch](https://www.bag.admin.ch/bag/admin/ch):  
420 Federal Office of Public Health,, **2022** 05.07.2022.
- 421 20. Fenwick C, Croxatto A, Coste AT, et al. Changes in SARS-CoV-2 Spike versus Nucleoprotein  
422 Antibody Responses Impact the Estimates of Infections in Population-Based  
423 Seroprevalence Studies. *J Virol* **2021**; 95(3).
- 424 21. Harris PA, Taylor R, Minor BL, et al. The REDCap consortium: Building an international  
425 community of software platform partners. *J Biomed Inform* **2019**; 95: 103208.
- 426 22. Harris PA, Taylor R, Thielke R, Payne J, Gonzalez N, Conde JG. Research electronic data  
427 capture (REDCap)--a metadata-driven methodology and workflow process for providing  
428 translational research informatics support. *J Biomed Inform* **2009**; 42(2): 377-81.
- 429 23. Brown EG, Wood L, Wood S. The medical dictionary for regulatory activities (MedDRA).  
430 *Drug Saf* **1999**; 20(2): 109-17.
- 431 24. Thomas SJ, Moreira ED, Kitchin N, et al. Safety and Efficacy of the BNT162b2 mRNA Covid-  
432 19 Vaccine through 6 Months. *N Engl J Med* **2021**; 385(19): 1761-73.
- 433 25. Jęskowiak I, Wiatrak B, Grosman-Dziewiszek P, Szelağ A. The Incidence and Severity of  
434 Post-Vaccination Reactions after Vaccination against COVID-19. *Vaccines (Basel)* **2021**;  
435 9(5).

- 436 26. Vigezzi GP, Lume A, Minerva M, et al. Safety surveillance after BNT162b2 mRNA COVID-  
437 19 vaccination: results from a cross-sectional survey among staff of a large Italian teaching  
438 hospital. *Acta Biomed* **2021**; 92(S6): e2021450.
- 439 27. Shimabukuro T. Allergic reactions including anaphylaxis after receipt of the first dose of  
440 Pfizer-BioNTech COVID-19 vaccine - United States, December 14-23, 2020. *Am J*  
441 *Transplant* **2021**; 21(3): 1332-7.
- 442 28. Blumenthal KG, Robinson LB, Camargo CA, et al. Acute Allergic Reactions to mRNA COVID-  
443 19 Vaccines. *JAMA* **2021**; 325(15): 1562-5.
- 444 29. Rogers A, Rooke E, Morant S, et al. Adverse events and overall health and well-being after  
445 COVID-19 vaccination: interim results from the VAC4COVID cohort safety study. *BMJ*  
446 *Open* **2022**; 12(6): e060583.
- 447 30. Lee KM, Junkins EJ, Fatima UA, Cox ML, Clancy KB. Characterizing menstrual bleeding  
448 changes occurring after SARS-CoV-2 vaccination. *medRxiv* **2021**: 2021.10.11.21264863.
- 449 31. Trogstad L. Increased occurrence of menstrual disturbances in 18-to 30-year-old women  
450 after COVID-19 vaccination. Available at SSRN 3998180 **2022**.
- 451 32. Ruggieri A, Anticoli S, D'Ambrosio A, Giordani L, Viora M. The influence of sex and gender  
452 on immunity, infection and vaccination. *Ann Ist Super Sanita* **2016**; 52(2): 198-204.
- 453 33. Klein SL, Marriott I, Fish EN. Sex-based differences in immune function and responses to  
454 vaccination. *Trans R Soc Trop Med Hyg* **2015**; 109(1): 9-15.
- 455 34. Flanagan KL, Fink AL, Plebanski M, Klein SL. Sex and Gender Differences in the Outcomes  
456 of Vaccination over the Life Course. *Annu Rev Cell Dev Biol* **2017**; 33: 577-99.

- 457 35. Fischinger S, Boudreau CM, Butler AL, Streeck H, Alter G. Sex differences in vaccine-  
458 induced humoral immunity. *Semin Immunopathol* **2019**; 41(2): 239-49.
- 459 36. Wadman M. Novavax's long-awaited COVID-19 vaccine authorizations offer an alternative  
460 to mRNA. Available at: [https://www.science.org/content/article/novavax-s-long-](https://www.science.org/content/article/novavax-s-long-awaited-covid-19-vaccine-authorizations-offer-alternative-mrna)  
461 [awaited-covid-19-vaccine-authorizations-offer-alternative-mrna](https://www.science.org/content/article/novavax-s-long-awaited-covid-19-vaccine-authorizations-offer-alternative-mrna). Accessed July 7th.
- 462 37. Wong MCS, Wong ELY, Cheung AWL, et al. COVID-19 Vaccine Hesitancy in a City with Free  
463 Choice and Sufficient Doses. *Vaccines (Basel)* **2021**; 9(11).
- 464 38. Latkin C, Dayton L, Yi G, Jaleel A, Nwosu C, Limaye R. COVID-19 vaccine delay: An  
465 examination of United States residents' intention to delay vaccine uptake. *Hum Vaccin*  
466 *Immunother* **2021**; 17(9): 2903-13.
- 467 39. Planès S, Villier C, Mallaret M. The nocebo effect of drugs. *Pharmacol Res Perspect* **2016**;  
468 4(2): e00208.
- 469 40. Amanzio M, Mitsikostas DD, Giovannelli F, Bartoli M, Cipriani GE, Brown WA. Adverse  
470 events of active and placebo groups in SARS-CoV-2 vaccine randomized trials: A  
471 systematic review. *Lancet Reg Health Eur* **2022**; 12: 100253.

472

473
