# Supplementary material for: Comparative adverse effects, perceptions and attitudes related to BNT162b2, mRNA1273, or JNJ-78436735 SARS-CoV-2 vaccines: A population-based longitudinal cohort
Source: bioRxiv or medRxiv preprint supplement (doi:10.1101/2022.09.27.22280403), 2022-09-27
Supplement: Supplementary file [file media-1.pdf]

1 **Supplementary Material**

2 **Supplement 1. Answers to trust related questions among mRNA vaccine recipients**

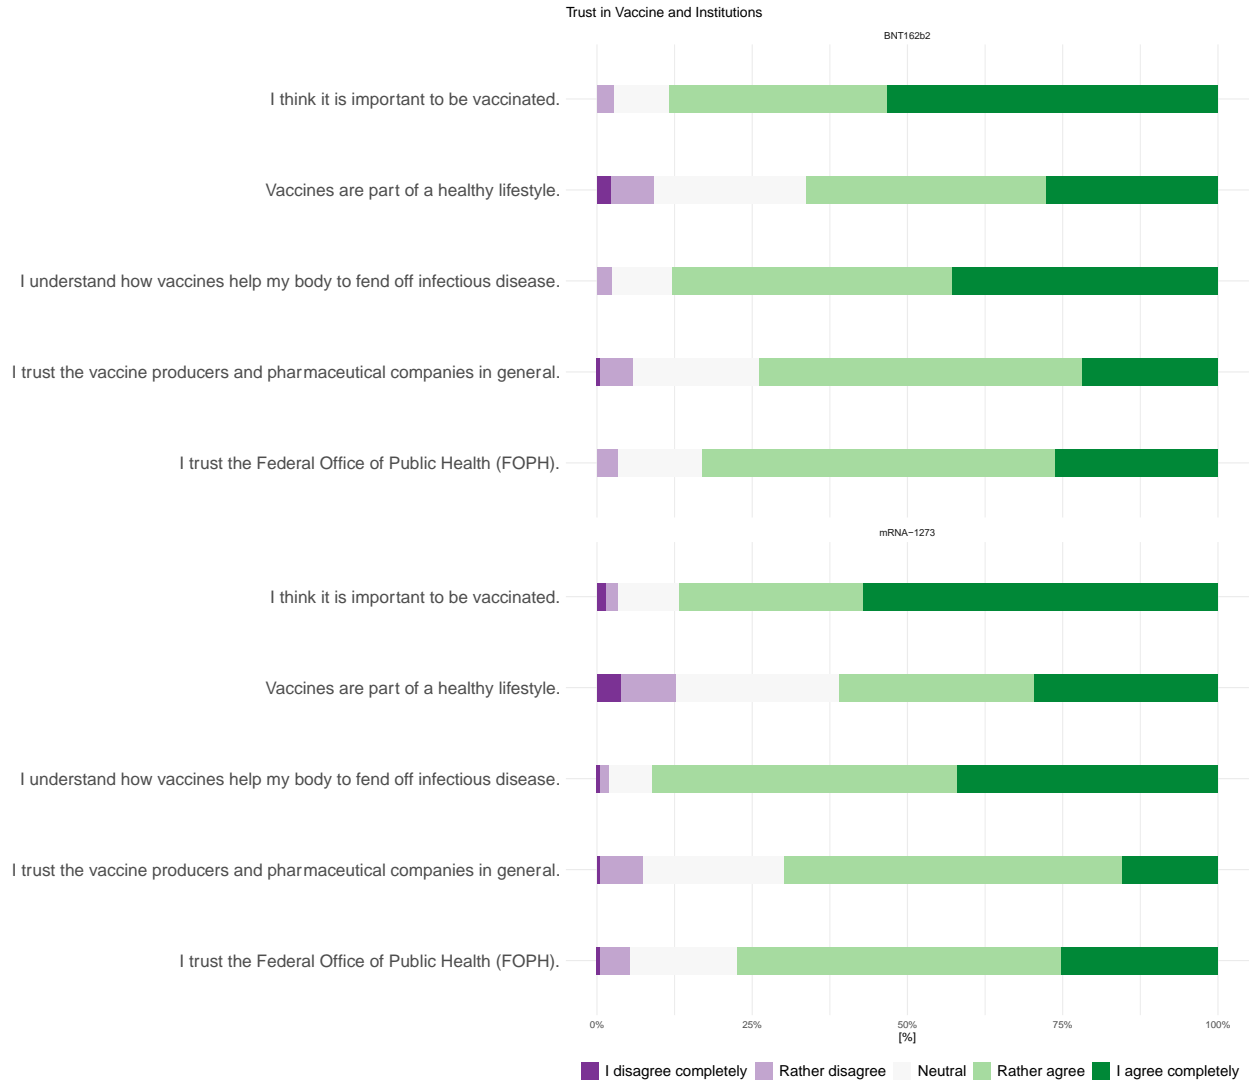

3

4

5 **Supplement 2.** MedDRA coding hierarchy (NEC= not elsewhere classified)

| <b>System Organ Class</b>            | <b>High Level Group Term</b>                               | <b>High Level Term</b>         | <b>Preferred Term</b>     | <b>Low Level Term</b>         |
|--------------------------------------|------------------------------------------------------------|--------------------------------|---------------------------|-------------------------------|
| blood and lymphatic system disorders | spleen, lymphatic and reticuloendothelial system disorders | lymphatic system disorders NEC | lymphadenopathy           | axillary lymph nodes enlarged |
|                                      |                                                            |                                |                           | lymph nodes cervical swollen  |
|                                      |                                                            |                                |                           | lymph nodes enlarged          |
| cardiac disorders                    | cardiac arrhythmias                                        | supraventricular arrhythmias   | atrial fibrillation       | atrial fibrillation           |
|                                      |                                                            | rate and rhythm disorders NEC  | tachycardia               | tachycardia                   |
|                                      | cardiac disorders, signs, and symptoms NEC                 | cardiac signs and symptoms NEC | palpitations              | palpitations                  |
|                                      |                                                            | pericardial disorders          | pericardial disorders NEC | pericardial effusion          |
| ear and labyrinth disorders          | aural disorders NEC                                        | ear disorders NEC              | ear inflammation          | ear inflammation              |
|                                      |                                                            |                                | ear pain                  | ear pain                      |
| eye disorders                        | eye disorders NEC                                          | lacrimation disorders          | dry eye                   | dry eyes                      |
|                                      |                                                            |                                | lacrimation increased     | watering eyes                 |
|                                      |                                                            | ocular disorders NEC           | ocular discomfort         | sensation of pressure in eye  |

| <b>System Organ Class</b> | <b>High Level Group Term</b>                           | <b>High Level Term</b>                                           | <b>Preferred Term</b>                      | <b>Low Level Term</b>    |            |
|---------------------------|--------------------------------------------------------|------------------------------------------------------------------|--------------------------------------------|--------------------------|------------|
|                           | ocular infections, irritations and inflammations       | conjunctival infections, irritations and inflammations           | conjunctivitis                             | conjunctivitis           |            |
|                           |                                                        | lid, lash and lacrimal infections, irritations and inflammations | blepharitis                                | blepharitis              |            |
|                           |                                                        | ocular infections, inflammations and associated manifestations   | eye irritations                            | burning eyes             |            |
|                           |                                                        |                                                                  | ocular hyperemia                           | eye red                  |            |
|                           | ocular structural change, deposit and degeneration NEC | retinal structural change, deposit and degeneration              | retinal detachment                         | retinal detachment       |            |
|                           | vision disorders                                       | visual disorders NEC                                             | vision blurred                             | blurred vision           |            |
|                           |                                                        | visual impairment and blindness (excluding color blindness)      | visual impairment                          | visual impairment        |            |
|                           | gastrointestinal disorders                             | dental and gingival conditions                                   | gingival Infections                        | gingivitis               | gingivitis |
|                           |                                                        |                                                                  | gingival disorders, signs and symptoms NEC | Non-infective gingivitis | sores gum  |
|                           |                                                        |                                                                  | dental pain and sensation disorders        | toothache                | tooth pain |

| <b>System Organ Class</b> | <b>High Level Group Term</b>                                     | <b>High Level Term</b>                  | <b>Preferred Term</b> | <b>Low Level Term</b>     |
|---------------------------|------------------------------------------------------------------|-----------------------------------------|-----------------------|---------------------------|
|                           | gastrointestinal infections                                      | gastric and gastrointestinal infections | gastroenteritis viral | stomach flu               |
|                           | gastrointestinal motility and defecation conditions              | diarrhea (excluding infective)          | diarrhea              | diarrhea                  |
|                           | gastrointestinal signs and symptoms                              | dyspeptic signs and symptoms            | dyspepsia             | digestion impaired        |
|                           |                                                                  |                                         |                       | stomach burning sensation |
|                           |                                                                  | flatulence, bloating and distension     | abdominal distension  | abdominal bloating        |
|                           |                                                                  |                                         | flatulence            | flatulence                |
|                           | gastrointestinal and abdominal pains (excluding oral and throat) |                                         | abdominal pain        | abdominal cramps          |
|                           |                                                                  |                                         |                       | abdominal pain            |
|                           |                                                                  |                                         | abdominal pain upper  | stomachache               |
|                           |                                                                  |                                         |                       | stomach cramps            |
|                           | gastrointestinal signs and symptoms NEC                          |                                         | abdominal discomfort  | stomach pain              |
|                           |                                                                  |                                         |                       | abdominal discomfort      |
|                           |                                                                  |                                         | breath odor           | bad breath                |

| System Organ Class         | High Level Group Term                                | High Level Term                                                  | Preferred Term                  | Low Level Term                  |
|----------------------------|------------------------------------------------------|------------------------------------------------------------------|---------------------------------|---------------------------------|
|                            |                                                      |                                                                  | odynophagia                     | swallowing<br>painful           |
|                            |                                                      | nausea and vomiting symptoms                                     | nausea                          | nausea                          |
|                            |                                                      |                                                                  | vomiting                        | vomiting                        |
|                            | gastrointestinal vascular conditions                 | hemorrhoids and gastrointestinal varices (excluding oesophageal) | haemorrhoidal<br>haemorrhage    | haemorrhoidal<br>bleeding       |
|                            | oral soft tissue conditions                          | oral soft tissue signs and symptoms                              | hypoaesthesia oral              | numbness of tongue              |
|                            |                                                      |                                                                  | lip discoloration               | lip discolouration              |
|                            |                                                      |                                                                  | oral pain                       | sensitive mouth                 |
|                            | saliva gland conditions                              | oral dryness and saliva altered                                  | dry mouth                       | dry mouth                       |
|                            | tongue conditions                                    | tongue signs and symptoms                                        | tongue discolouration           | tongue white                    |
|                            | general disorders and administration site conditions | administration site reactions                                    | injection site reactions        | injection site erythema         |
| injection site pruritus    |                                                      |                                                                  |                                 | injection site itching          |
| vaccination site reactions |                                                      |                                                                  | vaccination site discolouration | vaccination site discolouration |
|                            |                                                      |                                                                  | vaccination site haematoma      | vaccination site hematoma       |

| System Organ Class | High Level Group Term | High Level Term | Preferred Term               | Low Level Term        |          |                  |
|--------------------|-----------------------|-----------------|------------------------------|-----------------------|----------|------------------|
|                    |                       |                 | vaccination site             | vaccination site      |          |                  |
|                    |                       |                 | inflammation                 | inflammation          |          |                  |
|                    |                       |                 | vaccination site             | vaccination site      |          |                  |
|                    |                       |                 | irritation                   | irritation            |          |                  |
|                    |                       |                 | vaccination site             | vaccination site      |          |                  |
|                    |                       |                 | movement                     | movement              |          |                  |
|                    |                       |                 | impairment                   | impairment            |          |                  |
|                    |                       |                 | vaccination site pain        | vaccination site pain |          |                  |
|                    |                       |                 | vaccination site rash        | vaccination site rash |          |                  |
|                    |                       |                 | vaccination site             | vaccination site      |          |                  |
|                    |                       |                 | swelling                     | swelling              |          |                  |
|                    |                       |                 | vaccination site             | vaccination site      |          |                  |
|                    |                       |                 | tenderness                   | tenderness            |          |                  |
|                    |                       |                 | vaccination site             | vaccination site      |          |                  |
|                    |                       |                 | warmth                       | warmth                |          |                  |
|                    |                       |                 | body temperature conditions  | febrile disorders     | pyrexia  | fever            |
|                    |                       |                 |                              |                       |          | feverish         |
|                    |                       |                 | general system disorders NEC | asthenic conditions   | asthenia | energy decreased |
|                    |                       |                 | fatigue                      |                       |          |                  |
|                    |                       |                 | feeling of weakness          |                       |          |                  |

| System Organ Class | High Level Group Term | High Level Term         | Preferred Term          | Low Level Term         |
|--------------------|-----------------------|-------------------------|-------------------------|------------------------|
|                    |                       |                         |                         | feelings of weakness   |
|                    |                       |                         |                         | weakness               |
|                    |                       |                         | listlessness            | listlessness           |
|                    |                       |                         | malaise                 | feeling unwell         |
|                    |                       |                         |                         | unwell                 |
|                    |                       | feelings and sensations | chills                  | chills                 |
|                    |                       | NEC                     | decreased appetite      | appetite absent        |
|                    |                       |                         | feeling abnormal        | feeling dazed          |
|                    |                       |                         | feeling cold            | feeling cold           |
|                    |                       |                         | feeling hot             | feeling hot            |
|                    |                       |                         |                         | feeling of warmth      |
|                    |                       |                         |                         | sensation of heat      |
|                    |                       |                         | hot flush               | feeling of hot flushes |
|                    |                       |                         | hunger                  | feeling hungry         |
|                    |                       |                         | irritability            | feeling irritated      |
|                    |                       |                         | peripheral coldness     | cold extremities       |
|                    |                       |                         |                         | cold feet              |
|                    |                       |                         | temperature intolerance | heat sensitivity       |
|                    |                       |                         | thirst                  | thirst                 |
|                    |                       |                         | balance disorder        | unsteadiness           |

| System Organ Class      | High Level Group Term | High Level Term                | Preferred Term         | Low Level Term    |
|-------------------------|-----------------------|--------------------------------|------------------------|-------------------|
|                         |                       | general signs and symptoms NEC | hot flushes            | hot flushes       |
|                         |                       |                                |                        | hot flushes       |
|                         |                       |                                | hyperhidrosis          | excess sweating   |
|                         |                       |                                |                        | heavy sweating    |
|                         |                       |                                |                        | sweating          |
|                         |                       |                                |                        | sweating attack   |
|                         |                       |                                | influenza like illness | flu-like symptoms |
|                         |                       |                                | night sweats           | night sweats      |
|                         |                       |                                | peripheral swelling    | swelling arm      |
|                         |                       |                                |                        | swelling of legs  |
|                         |                       | swelling                       | swelling               |                   |
|                         |                       | oedema NEC                     | oedema peripheral      | leg edema         |
|                         |                       | pain and discomfort NEC        | axillary pain          | armpit pain       |
|                         |                       |                                | chest discomfort       | chest pressure    |
|                         |                       |                                | chest pain             | chest burning     |
|                         |                       |                                |                        | chest pain        |
|                         |                       |                                |                        | thorax pain       |
|                         |                       |                                | pain                   | general body pain |
|                         |                       | pain                           |                        |                   |
|                         |                       | pain                           |                        |                   |
| immune system disorders | allergic conditions   | allergic conditions NEC        | hypersensitivity       | allergic reaction |
|                         |                       | angioedemas                    | swollen tongue         | swollen tongue    |



| System Organ Class                              | High Level Group Term                                   | High Level Term                                         | Preferred Term             | Low Level Term                                                                                              |
|-------------------------------------------------|---------------------------------------------------------|---------------------------------------------------------|----------------------------|-------------------------------------------------------------------------------------------------------------|
|                                                 |                                                         | urticarias                                              | urticaria                  | urticaria                                                                                                   |
| infections and infestations                     | viral infectious disorders                              | herpes viral infections                                 | oral herpes                | cold sores                                                                                                  |
|                                                 |                                                         |                                                         |                            | cold sores lip                                                                                              |
|                                                 |                                                         |                                                         |                            | herpes labialis                                                                                             |
| investigations                                  | cardiac and vascular investigations (excl enzyme tests) | heart rate and pulse investigations                     | heart rate increased       | pulse rate increased                                                                                        |
|                                                 | physical examination and organ system status topics     | physical examination procedures and organ system status | body temperature increased | temperature elevation                                                                                       |
| metabolism and nutrition disorders              | electrolyte and fluid balance conditions                | total fluid volume increase                             | oedema                     | oedematous weight gain                                                                                      |
| musculoskeletal and connective tissue disorders | bone disorders (excl congenital and fractures)          | bone related signs and symptoms                         | bone pain                  | bone pain                                                                                                   |
|                                                 |                                                         | bone disorders NEC                                      | exostosis                  | bone spur                                                                                                   |
|                                                 | joint disorders                                         | joint related signs and symptoms                        | arthralgia                 | joint pain<br>knee pain<br>pain in joint<br>pain in joint involving hand<br>painful joints<br>shoulder pain |

| System Organ Class | High Level Group Term                               | High Level Term                                           | Preferred Term            | Low Level Term                 |
|--------------------|-----------------------------------------------------|-----------------------------------------------------------|---------------------------|--------------------------------|
|                    |                                                     | osteoarthropathies                                        | osteoarthritis            | arthrosis                      |
|                    |                                                     |                                                           |                           | gonarthrosis                   |
|                    | muscle disorders                                    | muscle pains                                              | myalgia                   | muscle pain                    |
|                    |                                                     |                                                           |                           | muscle soreness                |
|                    |                                                     |                                                           |                           | tenderness                     |
|                    |                                                     |                                                           |                           | muscle                         |
|                    |                                                     | muscle related signs and symptoms NEC                     | muscle spasms             | leg cramps                     |
|                    |                                                     |                                                           |                           | muscle cramps                  |
|                    |                                                     |                                                           | muscle swelling           | muscle swelling                |
|                    |                                                     |                                                           | muscle twitching          | muscle twitching               |
|                    |                                                     | muscle weakness conditions                                | muscular weakness         | muscle weakness                |
|                    |                                                     |                                                           |                           | lower limb                     |
|                    |                                                     | myopathies                                                | myopathy                  | myopathy                       |
|                    | musculoskeletal and connective tissue disorders NEC | musculoskeletal and connective tissue conditions NEC      | musculoskeletal stiffness | neck stiffness                 |
|                    |                                                     |                                                           |                           | stiffness shoulder             |
|                    |                                                     | musculoskeletal and connective tissue pain and discomfort | back pain                 | back pain                      |
|                    |                                                     |                                                           |                           | lumbago                        |
|                    |                                                     |                                                           |                           | muscular back pain             |
|                    |                                                     |                                                           | flank pain                | flank pain                     |
|                    |                                                     |                                                           | limb discomfort           | feeling heavy in arms and legs |

| System Organ Class                       | High Level Group Term                               | High Level Term           | Preferred Term | Low Level Term                 |                     |
|------------------------------------------|-----------------------------------------------------|---------------------------|----------------|--------------------------------|---------------------|
|                                          |                                                     |                           |                | heavy feeling in arms and legs |                     |
|                                          |                                                     |                           |                | musculoskeletal pain           | pain neck/ shoulder |
|                                          |                                                     |                           |                | neck pain                      | neck pain           |
|                                          |                                                     |                           |                | pain in extremity              | leg pain            |
|                                          |                                                     |                           |                |                                | pain foot           |
|                                          |                                                     |                           |                |                                | pain in fingers     |
|                                          |                                                     |                           |                |                                | pain in thumb       |
|                                          |                                                     |                           |                |                                | pain in toe         |
|                                          |                                                     |                           |                |                                | painful arm         |
|                                          |                                                     |                           |                |                                | painful feet        |
|                                          |                                                     |                           |                | painful hand                   |                     |
| tendon, ligament and cartilage disorders | tendon disorders                                    | tenosynovitis             | tendovaginitis |                                |                     |
| nervous system disorders                 | central nervous system infections and inflammations | meningitis NEC            | meningitis     | meningitis                     |                     |
|                                          | cranial nerve disorders (excl neoplasms)            | olfactory nerve disorders | anosmia        | smell loss                     |                     |
|                                          |                                                     | auditory nerve disorders  | tinnitus       | subjective tinnitus            |                     |
|                                          | headaches                                           | headaches NEC             | headache       | headache                       |                     |

| System Organ Class    | High Level Group Term                              | High Level Term                                        | Preferred Term           | Low Level Term           |
|-----------------------|----------------------------------------------------|--------------------------------------------------------|--------------------------|--------------------------|
|                       |                                                    |                                                        |                          | throbbing headache       |
|                       |                                                    | migraine headaches                                     | migraine                 | migraine                 |
|                       |                                                    |                                                        |                          | migraine with aura       |
|                       | movement disorders (incl parkinsonism)             | tremor (excl congenital)                               | tremor                   | shaking of hands         |
|                       | neurological disorders NEC                         | disturbances in consciousness NEC                      | loss of consciousness    | Consciousness<br>loss of |
|                       |                                                    | neurological signs and symptoms NEC                    | head discomfort          | head pressure            |
|                       |                                                    | paraesthesia and dysaesthesia                          | paraesthesia             | tingling sensation       |
|                       |                                                    | sensory abnormalities NEC                              | sensory loss             | loss of sensation        |
|                       |                                                    | vertigos NEC                                           | vertigo                  | vertigo                  |
| psychiatric disorders | cognitive and attention disorders and disturbances | cognitive and attention disorders and disturbances NEC | disturbance in attention | poor concentration       |
|                       | deliria (incl confusion)                           | confusion and disorientation                           | confusional state        | confusion                |
|                       | dementia and amnesic conditions                    | amnesic symptoms                                       | memory impairment        | forgetfulness            |

| System Organ Class                   | High Level Group Term                     | High Level Term                                   | Preferred Term        | Low Level Term                           |                                 |
|--------------------------------------|-------------------------------------------|---------------------------------------------------|-----------------------|------------------------------------------|---------------------------------|
|                                      | depressed mood disorders and disturbances | depressive disorders                              | depression            | depression                               |                                 |
|                                      |                                           | mood alterations with depressive symptoms         | depressed mood        | depressed mood                           |                                 |
|                                      | mood disorders and disturbances NEC       | emotional and mood disturbances NEC               | euphoric mood         | euphoria                                 |                                 |
|                                      | sleep disorders and disturbances          | disturbances in initiating and maintaining sleep  | insomnia              |                                          | sleeplessness                   |
|                                      |                                           |                                                   | dysomnias             | poor quality sleep                       | poor sleep<br>sleep restless    |
|                                      |                                           | sleep disorder NEC                                | sleep disorder        |                                          | disorder sleep<br>sleep problem |
|                                      |                                           |                                                   |                       |                                          |                                 |
|                                      |                                           |                                                   |                       |                                          |                                 |
|                                      | somatic symptom and related disorders     | somatic symptom disorders                         | conversion disorder   | Functional neurological symptom disorder |                                 |
|                                      | renal and urinary disorders               | bladder and bladder neck disorders (excl calculi) | bladder disorders NEC | bladder disorder                         | bladder disorder                |
| bladder infections and inflammations |                                           |                                                   | cystitis haemorrhagic | cystitis hemorrhagic                     |                                 |
| urinary tract signs and symptoms     |                                           | bladder and urethral symptoms                     | dysuria               |                                          | painful urination               |
|                                      |                                           |                                                   | incontinence          |                                          | incontinence                    |
|                                      |                                           |                                                   | micturition urgency   |                                          | urgency urination               |

| <b>System Organ Class</b>                       | <b>High Level Group Term</b>                               | <b>High Level Term</b>                 | <b>Preferred Term</b>    | <b>Low Level Term</b>    |
|-------------------------------------------------|------------------------------------------------------------|----------------------------------------|--------------------------|--------------------------|
| reproductive system and breast disorders        | breast disorders                                           | breast signs and symptoms              | breast pain              | mastodynia               |
|                                                 | menstrual cycle and uterine bleeding disorders             | menstrual and uterine bleeding NEC     | intermenstrual bleeding  | spotting between menses  |
|                                                 |                                                            |                                        | heavy menstrual bleeding | heavy menstrual bleeding |
|                                                 |                                                            |                                        | menstruation irregular   | menstrual irregularity   |
|                                                 |                                                            |                                        |                          | menstruation irregular   |
|                                                 | vulvovaginal disorders (excl infections and inflammations) | vulvovaginal disorders NEC             | vaginal haemorrhage      | spotting vaginal         |
| respiratory, thoracic and mediastinal disorders | pleural disorders                                          | pneumothorax and pleural effusions NEC | pleural effusion         | pleural effusion         |
|                                                 | respiratory disorders NEC                                  | breathing abnormalities                | dyspnoea                 | difficulty breathing     |
|                                                 |                                                            |                                        | cough                    | cough                    |
|                                                 |                                                            | coughing and associated symptoms       |                          |                          |
|                                                 | respiratory tract infections                               | upper respiratory tract infections NEC | laryngitis               | laryngitis               |
|                                                 |                                                            |                                        | nasopharyngitis          | cold symptoms            |
|                                                 |                                                            |                                        | sinusitis                | sinusitis                |

| System Organ Class                     | High Level Group Term                | High Level Term                                       | Preferred Term                       | Low Level Term         |                 |
|----------------------------------------|--------------------------------------|-------------------------------------------------------|--------------------------------------|------------------------|-----------------|
|                                        |                                      | viral upper respiratory tract infections              | influenza                            | flu symptoms           |                 |
|                                        | respiratory tract signs and symptoms | lower respiratory tract signs and symptoms            | hiccups                              | hiccups                |                 |
|                                        |                                      |                                                       | upper respiratory signs and symptoms | aphonia                | loss of voice   |
|                                        |                                      |                                                       |                                      | dry throat             | dry throat      |
|                                        |                                      | upper respiratory tract signs and symptoms            |                                      | speech disorder        | disorder speech |
|                                        |                                      |                                                       |                                      | oropharyngeal pain     | sore throat     |
|                                        |                                      |                                                       |                                      | rhinorrhoea            | rhinorrhea      |
|                                        |                                      | upper respiratory tract disorders (excl inflammation) | nasal congestions and inflammation   | nasal congestion       | nose congestion |
|                                        | rhinitis allergic                    |                                                       |                                      | allergic rhinitis      |                 |
|                                        | nasal disorders NEC                  |                                                       | epistaxis                            | nosebleed              |                 |
| skin and subcutaneous tissue disorders | epidermal and dermal conditions      | bullous conditions                                    | pemphigoid                           | bullous pemphigoid     |                 |
|                                        |                                      | dermal and epidermal conditions NEC                   | dry skin                             | dry skin               |                 |
|                                        |                                      |                                                       | hypoesthesia                         | body numbness          |                 |
|                                        |                                      |                                                       | skin burning sensation               | skin burning sensation |                 |
|                                        | erythemas                            |                                                       | erythema                             | redness                | redness         |
|                                        |                                      |                                                       |                                      | redness of face        | redness of face |
|                                        |                                      |                                                       |                                      | redness of legs        | redness of legs |

| System Organ Class             | High Level Group Term                                    | High Level Term                                              | Preferred Term                 | Low Level Term      |                  |
|--------------------------------|----------------------------------------------------------|--------------------------------------------------------------|--------------------------------|---------------------|------------------|
|                                |                                                          | papulosquamous conditions                                    | oral lichen planus             | oral lichen planus  |                  |
|                                |                                                          | pruritus NEC                                                 | pruritus                       | generalized itching |                  |
|                                |                                                          |                                                              |                                | itching             |                  |
|                                |                                                          | pustular conditions                                          | rash pustular                  | pustular rash       |                  |
|                                |                                                          | rashes, eruptions and exanthems NEC                          | rash                           | facial rash         |                  |
|                                |                                                          |                                                              |                                | skin rash           |                  |
|                                |                                                          |                                                              |                                | rash erythematous   | red rash         |
|                                | rash macular                                             |                                                              |                                | red spotty rash     |                  |
|                                |                                                          | rash pruritic                                                | itchy rash                     |                     |                  |
|                                | skin and subcutaneous tissue infections and infestations | skin and subcutaneous tissue bacterial infections            | furuncle                       | boil                |                  |
|                                |                                                          | skin and subcutaneous tissue viral infections                | herpes zoster                  | herpes zoster       |                  |
|                                |                                                          | skin appendage conditions                                    | alopecias                      | alopecia            | hair loss        |
|                                | pilar disorders NEC                                      |                                                              | piloerection                   | goose bumps         |                  |
|                                | vascular disorders                                       | decreased and nonspecific blood pressure disorders and shock | circulatory collapse and shock | dizziness           | dizziness        |
|                                |                                                          |                                                              |                                |                     | light headedness |
| vascular hypotensive disorders |                                                          |                                                              | hypotension                    | low blood pressure  |                  |



| System Organ Class | High Level Group Term           | High Level Term                     | Preferred Term | Low Level Term |
|--------------------|---------------------------------|-------------------------------------|----------------|----------------|
|                    | vascular hypertensive disorders | vascular hypertensive disorders NEC |                | hypertension   |

6

7 **Supplement 3.** Factors associated with adverse effect development after SARS-CoV2 vaccination

| Characteristic                                                                                            | OR (95%CI)          | p-value |
|-----------------------------------------------------------------------------------------------------------|---------------------|---------|
| <b>Age &lt;65 years (vs. ≥65 years)</b>                                                                   | 1.65 (0.96 to 2.9)  | 0.072   |
| <b>Female sex (vs male)</b>                                                                               | 4.05 (2.33 to 7.3)  | <0.001  |
| <b>Vaccine</b>                                                                                            |                     |         |
| BNT162b2                                                                                                  | 1 [Reference]       |         |
| mRNA-1273                                                                                                 | 2.38 (1.22 to 4.8)  | 0.013   |
| JNJ-78436735                                                                                              | 0.68 (0.36 to 1.3)  | 0.217   |
| <b>Education</b>                                                                                          |                     |         |
| None or mandatory school                                                                                  | 1 [Reference]       |         |
| Vocational training or specialized baccalaureate                                                          | 5.20 (1.56 to 17.5) | 0.007   |
| Higher education                                                                                          | 6.26 (1.86 to 21.2) | 0.003   |
| <b>Any preexisting condition (vs. none)</b>                                                               | 0.94 (0.51 to 1.8)  | 0.848   |
| <b>Low opinion of vaccination (vs. high)</b>                                                              | 0.98 (0.46 to 2.2)  | 0.960   |
| <b>SARS-CoV-2 Infection prior to baseline (self-reported infection or tested seropositive) (vs. none)</b> | 1.82 (0.79 to 4.8)  | 0.188   |

8

9

10 **Supplement 4.** Frequency of systemic and local adverse effects reported by participants after the first and second  
11 BNT162b2 and mRNA-1273 dose.

| <b>Adverse Effects by Vaccine Type</b> | <b>First dose</b> | <b>Second dose</b> | <b>Overall</b>  |
|----------------------------------------|-------------------|--------------------|-----------------|
| <b>mRNA-1273</b>                       | <b>(N=452)</b>    | <b>(N=587)</b>     | <b>(N=1039)</b> |
| Local adverse effects                  | 185 (40.9%)       | 129 (22.0%)        | 314 (30.2%)     |
| Systemic adverse effects               | 267 (59.1%)       | 458 (78.0%)        | 725 (69.8%)     |
| <b>BNT162b2</b>                        | <b>(N=319)</b>    | <b>(N=378)</b>     | <b>(N=697)</b>  |
| Local adverse effects                  | 115 (36.1%)       | 86 (22.8%)         | 201 (28.8%)     |
| Systemic adverse effects               | 204 (63.9%)       | 292 (77.2%)        | 496 (71.2%)     |

12

13 **Supplement 5.** Self-reported duration of adverse effects

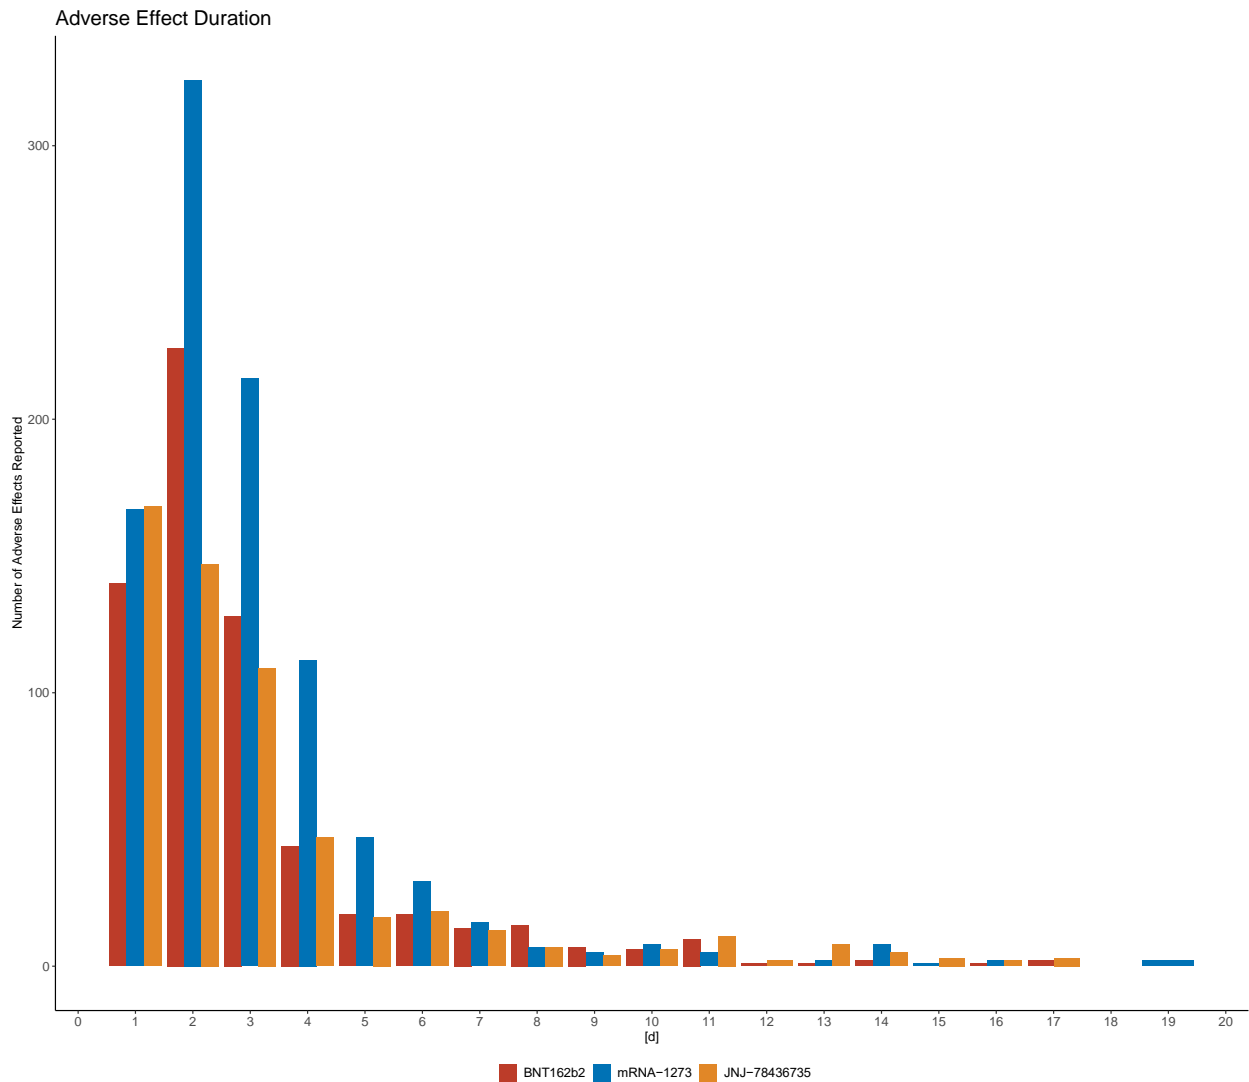

14

15

16 **Supplement 6.** Frequency of adverse effects according to MedDRA high level terms (NEC = not elsewhere

17 classified)

| MedDRA High Level Terms | BNT162b2<br>(N=697) | mRNA-1273<br>(N=1039) | JNJ-78436735<br>(N=661) | Overall<br>(N=2397) |
|-------------------------|---------------------|-----------------------|-------------------------|---------------------|
| amnesic symptoms        | 1 (0.1%)            | 0 (0.0%)              | 0 (0.0%)                | 1 (0.0%)            |
| asthenic conditions     | 115 (16.5%)         | 132 (12.7%)           | 72 (10.9%)              | 319 (13.3%)         |

|                                                             |            |             |            |             |
|-------------------------------------------------------------|------------|-------------|------------|-------------|
| bone disorders NEC                                          | 1 (0.1%)   | 0 (0.0%)    | 0 (0.0%)   | 1 (0.0%)    |
| bone related signs and symptoms                             | 1 (0.1%)   | 0 (0.0%)    | 0 (0.0%)   | 1 (0.0%)    |
| breathing abnormalities                                     | 5 (0.7%)   | 2 (0.2%)    | 5 (0.8%)   | 12 (0.5%)   |
| bullous conditions                                          | 2 (0.3%)   | 0 (0.0%)    | 0 (0.0%)   | 2 (0.1%)    |
| cardiac signs and symptoms NEC                              | 2 (0.3%)   | 3 (0.3%)    | 1 (0.2%)   | 6 (0.3%)    |
| circulatory collapse and shock                              | 2 (0.3%)   | 7 (0.7%)    | 9 (1.4%)   | 18 (0.8%)   |
| coughing and associated symptoms                            | 7 (1.0%)   | 7 (0.7%)    | 9 (1.4%)   | 23 (1.0%)   |
| dermal and epidermal conditions NEC                         | 2 (0.3%)   | 0 (0.0%)    | 0 (0.0%)   | 2 (0.1%)    |
| diarrhoea (excl infective)                                  | 15 (2.2%)  | 10 (1.0%)   | 9 (1.4%)   | 34 (1.4%)   |
| disturbances in consciousness NEC                           | 1 (0.1%)   | 0 (0.0%)    | 0 (0.0%)   | 1 (0.0%)    |
| disturbances in initiating and maintaining sleep            | 1 (0.1%)   | 1 (0.1%)    | 0 (0.0%)   | 2 (0.1%)    |
| dyspeptic signs and symptoms                                | 2 (0.3%)   | 3 (0.3%)    | 3 (0.5%)   | 8 (0.3%)    |
| dysomnias                                                   | 3 (0.4%)   | 2 (0.2%)    | 5 (0.8%)   | 10 (0.4%)   |
| ear disorders NEC                                           | 2 (0.3%)   | 5 (0.5%)    | 3 (0.5%)   | 10 (0.4%)   |
| erythemas                                                   | 1 (0.1%)   | 3 (0.3%)    | 0 (0.0%)   | 4 (0.2%)    |
| febrile disorders                                           | 20 (2.9%)  | 63 (6.1%)   | 55 (8.3%)  | 138 (5.8%)  |
| feelings and sensations NEC                                 | 23 (3.3%)  | 54 (5.2%)   | 53 (8.0%)  | 130 (5.4%)  |
| gastric and gastroenteric infections                        | 1 (0.1%)   | 0 (0.0%)    | 0 (0.0%)   | 1 (0.0%)    |
| gastrointestinal and abdominal pains (excl oral and throat) | 5 (0.7%)   | 8 (0.8%)    | 1 (0.2%)   | 14 (0.6%)   |
| gastrointestinal signs and symptoms NEC                     | 3 (0.4%)   | 5 (0.5%)    | 2 (0.3%)   | 10 (0.4%)   |
| general signs and symptoms NEC                              | 14 (2.0%)  | 21 (2.0%)   | 31 (4.7%)  | 66 (2.8%)   |
| gingival disorders, signs, and symptoms NEC                 | 1 (0.1%)   | 0 (0.0%)    | 1 (0.2%)   | 2 (0.1%)    |
| headaches NEC                                               | 78 (11.2%) | 105 (10.1%) | 88 (13.3%) | 271 (11.3%) |

|                                                                      |             |             |           |             |
|----------------------------------------------------------------------|-------------|-------------|-----------|-------------|
| herpes viral infections                                              | 4 (0.6%)    | 4 (0.4%)    | 7 (1.1%)  | 15 (0.6%)   |
| injection site reactions                                             | 1 (0.1%)    | 35 (3.4%)   | 2 (0.3%)  | 38 (1.6%)   |
| joint related signs and symptoms                                     | 13 (1.9%)   | 17 (1.6%)   | 15 (2.3%) | 45 (1.9%)   |
| lacrimation disorders                                                | 1 (0.1%)    | 1 (0.1%)    | 0 (0.0%)  | 2 (0.1%)    |
| lid, lash and lacrimal infections, irritations,<br>and inflammations | 1 (0.1%)    | 0 (0.0%)    | 0 (0.0%)  | 1 (0.0%)    |
| lymphatic system disorders NEC                                       | 5 (0.7%)    | 10 (1.0%)   | 8 (1.2%)  | 23 (1.0%)   |
| menstrual and uterine bleeding NEC                                   | 1 (0.1%)    | 2 (0.2%)    | 0 (0.0%)  | 3 (0.1%)    |
| menstruation with increased bleeding                                 | 7 (1.0%)    | 3 (0.3%)    | 3 (0.5%)  | 13 (0.5%)   |
| migraine headaches                                                   | 1 (0.1%)    | 4 (0.4%)    | 6 (0.9%)  | 11 (0.5%)   |
| mood alterations with depressive<br>symptoms                         | 3 (0.4%)    | 1 (0.1%)    | 2 (0.3%)  | 6 (0.3%)    |
| muscle pains                                                         | 7 (1.0%)    | 21 (2.0%)   | 12 (1.8%) | 40 (1.7%)   |
| muscle related signs and symptoms NEC                                | 6 (0.9%)    | 2 (0.2%)    | 5 (0.8%)  | 13 (0.5%)   |
| musculoskeletal and connective tissue<br>conditions NEC              | 5 (0.7%)    | 4 (0.4%)    | 1 (0.2%)  | 10 (0.4%)   |
| musculoskeletal and connective tissue pain<br>and discomfort         | 107 (15.4%) | 153 (14.7%) | 32 (4.8%) | 292 (12.2%) |
| nasal congestions and inflammation                                   | 1 (0.1%)    | 2 (0.2%)    | 2 (0.3%)  | 5 (0.2%)    |
| nausea and vomiting symptoms                                         | 10 (1.4%)   | 25 (2.4%)   | 16 (2.4%) | 51 (2.1%)   |
| ocular disorders NEC                                                 | 2 (0.3%)    | 0 (0.0%)    | 0 (0.0%)  | 2 (0.1%)    |
| oedema NEC                                                           | 1 (0.1%)    | 0 (0.0%)    | 0 (0.0%)  | 1 (0.0%)    |
| oral dryness and saliva altered                                      | 3 (0.4%)    | 2 (0.2%)    | 2 (0.3%)  | 7 (0.3%)    |
| osteoarthropathies                                                   | 2 (0.3%)    | 0 (0.0%)    | 0 (0.0%)  | 2 (0.1%)    |
| pain and discomfort NEC                                              | 34 (4.9%)   | 65 (6.3%)   | 42 (6.4%) | 141 (5.9%)  |
| Papulosquamous conditions                                            | 1 (0.1%)    | 0 (0.0%)    | 0 (0.0%)  | 1 (0.0%)    |

|                                                         |             |             |           |             |
|---------------------------------------------------------|-------------|-------------|-----------|-------------|
| paresthesia and dysesthesia                             | 7 (1.0%)    | 2 (0.2%)    | 5 (0.8%)  | 14 (0.6%)   |
| pericardial disorders NEC                               | 1 (0.1%)    | 0 (0.0%)    | 0 (0.0%)  | 1 (0.0%)    |
| physical examination procedures and organ system status | 6 (0.9%)    | 10 (1.0%)   | 0 (0.0%)  | 16 (0.7%)   |
| pneumothorax and pleural effusions NEC                  | 1 (0.1%)    | 0 (0.0%)    | 0 (0.0%)  | 1 (0.0%)    |
| pruritus NEC                                            | 2 (0.3%)    | 6 (0.6%)    | 2 (0.3%)  | 10 (0.4%)   |
| rashes, eruptions and exanthemas NEC                    | 3 (0.4%)    | 8 (0.8%)    | 7 (1.1%)  | 18 (0.8%)   |
| skin and subcutaneous tissue viral infections           | 3 (0.4%)    | 2 (0.2%)    | 3 (0.5%)  | 8 (0.3%)    |
| supraventricular arrhythmias                            | 1 (0.1%)    | 0 (0.0%)    | 0 (0.0%)  | 1 (0.0%)    |
| total fluid volume increase                             | 1 (0.1%)    | 0 (0.0%)    | 0 (0.0%)  | 1 (0.0%)    |
| upper respiratory signs and symptoms                    | 2 (0.3%)    | 1 (0.1%)    | 2 (0.3%)  | 5 (0.2%)    |
| upper respiratory tract infections NEC                  | 7 (1.0%)    | 6 (0.6%)    | 7 (1.1%)  | 20 (0.8%)   |
| upper respiratory tract signs and symptoms              | 9 (1.3%)    | 12 (1.2%)   | 16 (2.4%) | 37 (1.5%)   |
| urticaria                                               | 1 (0.1%)    | 0 (0.0%)    | 2 (0.3%)  | 3 (0.1%)    |
| vaccination site reactions                              | 113 (16.2%) | 150 (14.4%) | 52 (7.9%) | 315 (13.1%) |
| vascular hypotensive disorders                          | 2 (0.3%)    | 2 (0.2%)    | 0 (0.0%)  | 4 (0.2%)    |
| vertigos NEC                                            | 13 (1.9%)   | 15 (1.4%)   | 16 (2.4%) | 44 (1.8%)   |
| viral upper respiratory tract infections                | 1 (0.1%)    | 5 (0.5%)    | 0 (0.0%)  | 6 (0.3%)    |
| allergic conditions NEC                                 | 0 (0.0%)    | 1 (0.1%)    | 1 (0.2%)  | 2 (0.1%)    |
| alopecias                                               | 0 (0.0%)    | 2 (0.2%)    | 0 (0.0%)  | 2 (0.1%)    |
| angioedemas                                             | 0 (0.0%)    | 2 (0.2%)    | 0 (0.0%)  | 2 (0.1%)    |
| bladder disorders NEC                                   | 0 (0.0%)    | 1 (0.1%)    | 1 (0.2%)  | 2 (0.1%)    |
| breast signs and symptoms                               | 0 (0.0%)    | 1 (0.1%)    | 0 (0.0%)  | 1 (0.0%)    |

|                                                             |          |          |          |           |
|-------------------------------------------------------------|----------|----------|----------|-----------|
| cognitive and attention disorders and disturbances NEC      | 0 (0.0%) | 3 (0.3%) | 0 (0.0%) | 3 (0.1%)  |
| confusion and disorientation                                | 0 (0.0%) | 1 (0.1%) | 0 (0.0%) | 1 (0.0%)  |
| dental pain and sensation disorders                         | 0 (0.0%) | 1 (0.1%) | 0 (0.0%) | 1 (0.0%)  |
| depressive disorders                                        | 0 (0.0%) | 1 (0.1%) | 2 (0.3%) | 3 (0.1%)  |
| emotional and mood disturbances NEC                         | 0 (0.0%) | 1 (0.1%) | 0 (0.0%) | 1 (0.0%)  |
| flatulence, bloating and distension                         | 0 (0.0%) | 1 (0.1%) | 2 (0.3%) | 3 (0.1%)  |
| gingival Infections                                         | 0 (0.0%) | 2 (0.2%) | 0 (0.0%) | 2 (0.1%)  |
| heart rate and pulse investigations                         | 0 (0.0%) | 1 (0.1%) | 1 (0.2%) | 2 (0.1%)  |
| lower respiratory tract signs and symptoms                  | 0 (0.0%) | 1 (0.1%) | 0 (0.0%) | 1 (0.0%)  |
| muscle weakness conditions                                  | 0 (0.0%) | 1 (0.1%) | 0 (0.0%) | 1 (0.0%)  |
| myopathies                                                  | 0 (0.0%) | 1 (0.1%) | 0 (0.0%) | 1 (0.0%)  |
| neurological signs and symptoms NEC                         | 0 (0.0%) | 4 (0.4%) | 8 (1.2%) | 12 (0.5%) |
| oral soft tissue signs and symptoms                         | 0 (0.0%) | 2 (0.2%) | 0 (0.0%) | 2 (0.1%)  |
| pilar disorders NEC                                         | 0 (0.0%) | 1 (0.1%) | 0 (0.0%) | 1 (0.0%)  |
| pustular conditions                                         | 0 (0.0%) | 1 (0.1%) | 0 (0.0%) | 1 (0.0%)  |
| rate and rhythm disorders NEC                               | 0 (0.0%) | 2 (0.2%) | 2 (0.3%) | 4 (0.2%)  |
| retinal structural change, deposit, and degeneration        | 0 (0.0%) | 1 (0.1%) | 0 (0.0%) | 1 (0.0%)  |
| sleep disorder NEC                                          | 0 (0.0%) | 2 (0.2%) | 0 (0.0%) | 2 (0.1%)  |
| tongue signs and symptoms                                   | 0 (0.0%) | 1 (0.1%) | 0 (0.0%) | 1 (0.0%)  |
| visual disorders NEC                                        | 0 (0.0%) | 1 (0.1%) | 0 (0.0%) | 1 (0.0%)  |
| visual impairment and blindness (excluding color blindness) | 0 (0.0%) | 1 (0.1%) | 2 (0.3%) | 3 (0.1%)  |
| vulvovaginal disorders NEC                                  | 0 (0.0%) | 1 (0.1%) | 0 (0.0%) | 1 (0.0%)  |
| auditory nerve disorders                                    | 0 (0.0%) | 0 (0.0%) | 2 (0.3%) | 2 (0.1%)  |

|                                                                   |          |          |          |          |
|-------------------------------------------------------------------|----------|----------|----------|----------|
| bladder and urethral symptoms                                     | 0 (0.0%) | 0 (0.0%) | 4 (0.6%) | 4 (0.2%) |
| bladder infections and inflammations                              | 0 (0.0%) | 0 (0.0%) | 1 (0.2%) | 1 (0.0%) |
| conjunctival infections, irritations, and inflammations           | 0 (0.0%) | 0 (0.0%) | 1 (0.2%) | 1 (0.0%) |
| haemorrhoids and gastrointestinal varices (excluding oesophageal) | 0 (0.0%) | 0 (0.0%) | 1 (0.2%) | 1 (0.0%) |
| meningitis NEC                                                    | 0 (0.0%) | 0 (0.0%) | 1 (0.2%) | 1 (0.0%) |
| nasal disorders NEC                                               | 0 (0.0%) | 0 (0.0%) | 7 (1.1%) | 7 (0.3%) |
| ocular infections, inflammations, and associated manifestations   | 0 (0.0%) | 0 (0.0%) | 5 (0.8%) | 5 (0.2%) |
| olfactory nerve disorders                                         | 0 (0.0%) | 0 (0.0%) | 1 (0.2%) | 1 (0.0%) |
| sensory abnormalities NEC                                         | 0 (0.0%) | 0 (0.0%) | 1 (0.2%) | 1 (0.0%) |
| somatic symptom disorders                                         | 0 (0.0%) | 0 (0.0%) | 1 (0.2%) | 1 (0.0%) |
| tendon disorders                                                  | 0 (0.0%) | 0 (0.0%) | 1 (0.2%) | 1 (0.0%) |
| tremor (excl congenital)                                          | 0 (0.0%) | 0 (0.0%) | 1 (0.2%) | 1 (0.0%) |
| vascular hypertensive disorders NEC                               | 0 (0.0%) | 0 (0.0%) | 1 (0.2%) | 1 (0.0%) |

18

19
